# Supplementary material for: Global and regional overview of the inclusion of paediatric surgery in the national health plans of 124 countries: an ecological study
Source: PubMed Central journal article supplement — BMJ Open. 2021 Jun 16;11(6):e045981. doi: 10.1136/bmjopen-2020-045981 (PMC8211076; doi:10.1136/bmjopen-2020-045981), 2021-06-16

**Supplemental material 1:** Complete list of search terms and associated variations found in NHPSPs, stratified by language English, French, and Spanish.

| ENGLISH                           |                                                         | FRENCH                                                                      |                                                                                                                  | SPANISH                                 |                                                                |
|-----------------------------------|---------------------------------------------------------|-----------------------------------------------------------------------------|------------------------------------------------------------------------------------------------------------------|-----------------------------------------|----------------------------------------------------------------|
| Search Terms                      | Variations found                                        | Search Terms                                                                | Variations found                                                                                                 | Search Terms                            | Variations found                                               |
| <b>Surgery-specific</b>           |                                                         |                                                                             |                                                                                                                  |                                         |                                                                |
| surg*                             | surgery, surgeries, surgical, neurosurgery, and surgeon | chirurgi*                                                                   | chirurgie, chirurgien, chirurgicale, chirurgicaux, chirurgiens, neurochirurgien, médocochirurgicaux, chirurgical | cirug* / ciruj* / quirurgic*            | cirugía, cirujano, cirujanos, quirúrgico                       |
| injury                            |                                                         | blesure*                                                                    | blesure, blessures                                                                                               | lesion*                                 | lesión, lesiones                                               |
| trauma                            |                                                         | traumat*                                                                    | traumatismes, traumatique, traumatology                                                                          | trauma*                                 | trauma, traumatismo                                            |
| operation                         |                                                         | operation / intervention                                                    |                                                                                                                  | operacion*                              | operación, operaciones                                         |
| operative                         |                                                         | opérateur                                                                   |                                                                                                                  | operativo*                              | operativo, operativos                                          |
| operating                         |                                                         | opérateur / opérant                                                         |                                                                                                                  | N/A                                     |                                                                |
| open fracture fixation / fracture |                                                         | fixation de fracture ouverte / ostéosynthèse de fracture ouverte / fracture |                                                                                                                  | fijación de fractura abierta / fractura |                                                                |
| inguinal hernia / hernia          |                                                         | hernie inguinale / hernie                                                   |                                                                                                                  | hernia inguinal / hernia                |                                                                |
| pediatric surgery                 |                                                         | chirurgie pédiatrique                                                       |                                                                                                                  | cirugía pediátrica                      |                                                                |
| <b>Children-specific</b>          |                                                         |                                                                             |                                                                                                                  |                                         |                                                                |
| child*                            | child, children, childbearing, childbirth, childhood    | enfant* / naissance                                                         | enfant, enfants, enfance,                                                                                        | niñ*                                    | niño, niños, niña, niñas, niñez                                |
| immuniz*                          | immunization, immunized                                 | immunis* / vaccin*                                                          | Immunisation, vacciné                                                                                            | vacuna* inmuniz*                        | vacuna, vacunación, vacunaciones, inmunización, inmunizaciones |
| infant                            |                                                         | bébé / infant*                                                              | infantile                                                                                                        | infant*                                 | infante, infantes, infantil                                    |
| malnutrition                      |                                                         | malnutrition                                                                |                                                                                                                  | desnutrición                            |                                                                |
| stunt*                            | stunting                                                | retard de croissance                                                        |                                                                                                                  | retraso en el crecimiento               |                                                                |
| pedia*                            | pediatric, pediatrics                                   | pédiatr*                                                                    | pédiatrique, pédiatriques, pédiatres, pédiatrie,                                                                 | pedia*                                  | pediátrico, pediatría, pediátrica, pediatras,                  |
| wasting                           |                                                         | dépérissement                                                               |                                                                                                                  | anemia                                  |                                                                |
| circumcision                      |                                                         | circoncision / posthectomy                                                  |                                                                                                                  | circuncisión                            |                                                                |

**Supplemental material 2:** Country health plans stratified by WHO's region and World Bank's income classification level.

|                                               | <b>Total</b> | <b>Excluded because NHPSP unavailable</b> | <b>Excluded because not in English, Spanish, or French</b> | <b>Total available for search</b> |
|-----------------------------------------------|--------------|-------------------------------------------|------------------------------------------------------------|-----------------------------------|
|                                               | n (%)        | n (%)                                     | n (%)                                                      | n (%)                             |
|                                               | 194 (100.0)  | 48 (100.0)                                | 22 (100.0)                                                 | 124 (100.0)                       |
| <b>WHO region</b>                             |              |                                           |                                                            |                                   |
| Africa                                        | 47 (24.2)    | 7 (14.6)                                  | 2 (9.1)                                                    | 38 (30.6)                         |
| Americas                                      | 35 (18.0)    | 10 (20.8)                                 | 1 (4.5)                                                    | 24 (19.4)                         |
| Eastern Mediterranean                         | 21 (10.8)    | 7 (15.6)                                  | 2 (9.1)                                                    | 12 (9.7)                          |
| Europe                                        | 53 (27.3)    | 17 (35.4)                                 | 17 (77.3)                                                  | 19 (15.3)                         |
| South East Asia                               | 11 (5.7)     | 3 (6.3)                                   | 0 (0.0)                                                    | 8 (6.5)                           |
| West Pacific                                  | 27 (13.9)    | 4 (8.3)                                   | 0 (0.0)                                                    | 23 (18.5)                         |
| <b>World Bank Income Classification Level</b> |              |                                           |                                                            |                                   |
| HIC                                           | 56 (28.9)    | 25 (52.1)                                 | 9 (40.9)                                                   | 22 (17.7)                         |
| UMIC                                          | 61 (31.4)    | 10 (20.8)                                 | 11 (50.0)                                                  | 40 (32.2)                         |
| LMIC                                          | 44 (22.7)    | 7 (14.6)                                  | 2 (9.1)                                                    | 35 (28.5)                         |
| LIC                                           | 33 (17.0)    | 6 (12.5)                                  | 0 (0.0)                                                    | 27 (21.8)                         |

HIC=High Income Countries, UMIC=Upper-Middle-Income Countries, LMIC=Lower-Middle-Income Countries, LIC=Low Income Countries.

**Supplemental material 3:** Search Terms in English, French, and Spanish with number of citations stratified by WHO regions and World Bank income classification level.

|                          | WHO Region   |             |             |             |              |             | World Bank Income Classification Level |               |               |              | TOTAL<br>n (%) |
|--------------------------|--------------|-------------|-------------|-------------|--------------|-------------|----------------------------------------|---------------|---------------|--------------|----------------|
|                          | AF<br>n (%)  | AM<br>n (%) | EM<br>n (%) | EU<br>n (%) | SEA<br>n (%) | WP<br>n (%) | HIC<br>n (%)                           | UMIC<br>n (%) | LMIC<br>n (%) | LIC<br>n (%) |                |
|                          | 2330 (100.0) | 325 (100.0) | 175 (100.0) | 224 (100.0) | 209 (100.0)  | 520 (100.0) | 286 (100.0)                            | 838 (100.0)   | 1065 (100.0)  | 1594 (100.0) | 3783 (100.0)   |
| <b>Surgery-specific</b>  |              |             |             |             |              |             |                                        |               |               |              |                |
| Surg*                    | 169 (7.3)    | 17 (5.2)    | 21 (12.0)   | 4 (1.8)     | 23 (11.0)    | 35 (6.7)    | 11 (3.8)                               | 80 (9.5)      | 58 (5.4)      | 120 (7.5)    | 269 (7.1)      |
| Injury                   | 123 (5.3)    | 11 (3.4)    | 3 (1.7)     | 1 (0.4)     | 10 (4.8)     | 7 (1.3)     | 20 (7.0)                               | 23 (2.7)      | 48 (4.5)      | 64 (4.0)     | 155 (4.1)      |
| Trauma                   | 73 (3.1)     | 15 (4.6)    | 1 (0.6)     | 3 (1.3)     | 6 (2.9)      | 4 (0.8)     | 5 (1.7)                                | 27 (3.2)      | 40 (3.8)      | 30 (1.9)     | 102 (2.7)      |
| Operation                | 7 (0.3)      | 4 (1.2)     | 1 (0.6)     | 1 (0.4)     | 0 (0.0)      | 62 (11.9)   | 1 (0.3)                                | 39 (4.7)      | 32 (3.0)      | 3 (0.2)      | 75 (2.0)       |
| Operative                | 26 (1.1)     | 0 (0.0)     | 0 (0.0)     | 0 (0.0)     | 0 (0.0)      | 6 (1.2)     | 4 (1.4)                                | 6 (0.7)       | 13 (1.2)      | 9 (0.6)      | 32 (0.8)       |
| Operating                | 7 (0.3)      | 0 (0.0)     | 0 (0.0)     | 1 (0.4)     | 0 (0.0)      | 20 (3.8)    | 5 (1.7)                                | 12 (1.4)      | 5 (0.5)       | 6 (0.4)      | 28 (0.7)       |
| Open Frac. Fix.          | 0 (0.0)      | 0 (0.0)     | 0 (0.0)     | 0 (0.0)     | 1 (0.5)      | 2 (0.4)     | 0 (0.0)                                | 2 (0.2)       | 0 (0.0)       | 1 (0.1)      | 3 (0.1)        |
| Inguinal Hernia          | 0 (0.0)      | 0 (0.0)     | 0 (0.0)     | 0 (0.0)     | 0 (0.0)      | 0 (0.0)     | 0 (0.0)                                | 0 (0.0)       | 0 (0.0)       | 0 (0.0)      | 0 (0.0)        |
| 'Pediatric Surgery'      | 3 (0.1)      | 1 (0.3)     | 0 (0.0)     | 1 (0.4)     | 0 (0.0)      | 4 (0.8)     | 1 (0.3)                                | 2 (0.2)       | 3 (0.3)       | 3 (0.2)      | 9 (0.2)        |
| <b>Children-specific</b> |              |             |             |             |              |             |                                        |               |               |              |                |
| Child*                   | 1396 (59.9)  | 170 (52.3)  | 88 (50.3)   | 143 (63.8)  | 101 (48.3)   | 244 (46.9)  | 145 (50.7)                             | 426 (50.8)    | 620 (58.2)    | 951 (59.7)   | 2142 (56.6)    |
| Immuniz*                 | 131 (5.6)    | 27 (8.3)    | 14 (8.0)    | 31 (13.8)   | 29 (13.9)    | 48 (9.2)    | 30 (10.5)                              | 57 (6.8)      | 88 (8.3)      | 105 (6.6)    | 280 (7.4)      |
| Infant                   | 127 (5.5)    | 36 (11.1)   | 23 (13.1)   | 28 (12.5)   | 20 (9.6)     | 51 (9.8)    | 41 (14.3)                              | 89 (10.6)     | 70 (6.6)      | 85 (5.3)     | 285 (7.5)      |
| Malnutrition             | 173 (7.4)    | 20 (6.2)    | 16 (9.1)    | 8 (3.6)     | 9 (4.3)      | 16 (3.1)    | 7 (2.4)                                | 35 (4.2)      | 49 (4.6)      | 151 (9.5)    | 242 (6.4)      |
| Stunt*                   | 48 (2.1)     | 2 (0.6)     | 4 (2.3)     | 0 (0.0)     | 5 (2.4)      | 8 (1.5)     | 5 (1.7)                                | 6 (0.7)       | 26 (2.4)      | 30 (1.9)     | 67 (1.8)       |
| Pedia*                   | 16 (0.7)     | 11 (3.4)    | 2 (1.1)     | 2 (0.9)     | 2 (1.0)      | 11 (2.1)    | 7 (2.4)                                | 17 (2.0)      | 7 (0.7)       | 13 (0.8)     | 44 (1.2)       |
| Wasting                  | 15 (0.6)     | 11 (3.4)    | 2 (1.1)     | 1 (0.4)     | 3 (1.4)      | 1 (0.2)     | 4 (1.4)                                | 10 (1.2)      | 4 (0.4)       | 15 (0.9)     | 33 (0.9)       |
| Circumcision             | 16 (0.7)     | 0 (0.0)     | 0 (0.0)     | 0 (0.0)     | 0 (0.0)      | 1 (0.2)     | 0(0.0)                                 | 7 (0.8)       | 2 (0.2)       | 8 (0.5)      | 17 (0.4)       |

AF=African region, AM=American region, EM= Eastern Mediterranean region, EU=European region, SEA=South East Asia region, WP=West Pacific region.

HIC=High Income Countries, UMIC=Upper-Middle-Income Countries, LMIC=Lower-Middle-Income Countries, LIC=Low Income Countries.

For simplicity, only the English terms are used to describe the aggregated statistics of English, Spanish, and French search terms.

<sup>a</sup> *surg*\* includes surgery, surgeries, surgical, neurosurgery, and surgeon. <sup>b</sup> *child*\* includes child, children, childbearing, childbirth, and childhood. <sup>c</sup> *immuniz*\* includes immunization, and immunized. <sup>d</sup> *stunt*\* includes stunting. <sup>e</sup> *pedia*\* includes pediatric and pediatrics.

**Supplemental material 4:** Percentages of search terms in English, French, and Spanish with number of citations stratified by WHO regions.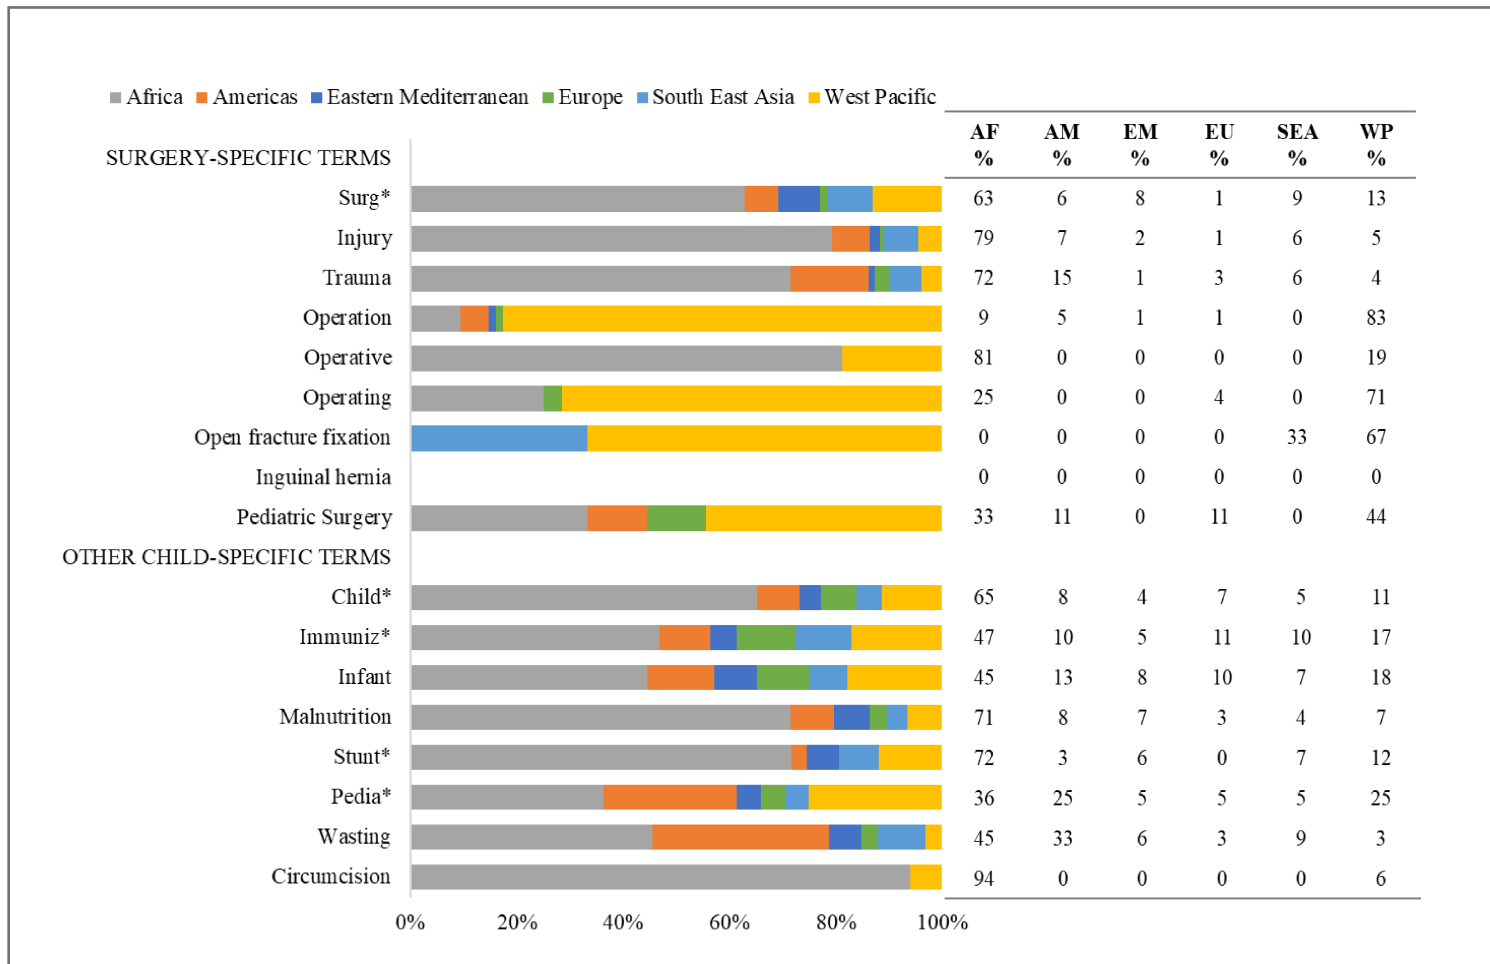

For simplicity, only the English terms are used to describe the aggregated statistics of English, Spanish, and French search terms.

*surg\** includes surgery, surgeries, surgical, neurosurgery, and surgeon. *child\** includes child, children, childbearing, childbirth, and childhood.

*immuniz\** includes immunization, and immunized. *stunt\** includes stunting. *pedia\** includes pediatric and pediatrics.

**Supplemental material 5:** Percentages of search terms in English, French, and Spanish with number of citations stratified by World Bank income classification level.

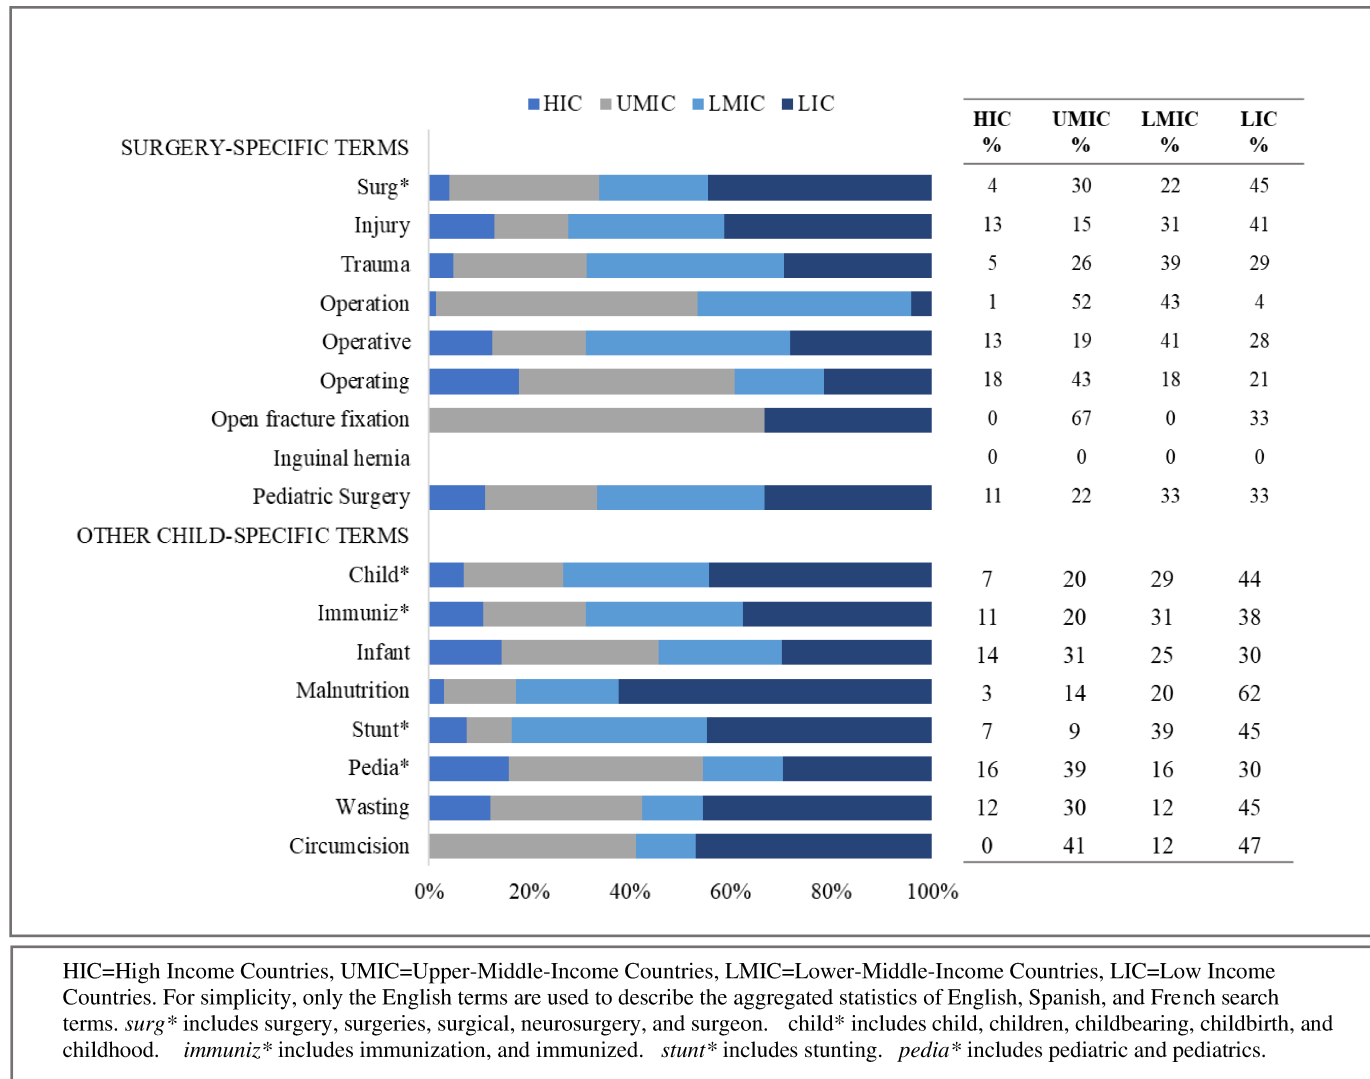

Supplement: bmjopen-2020-045981supp001.pdf [file bmjopen-2020-045981supp001.pdf]
