# Supplementary material for: Global and regional overview of the inclusion of paediatric surgery in the national health plans of 124 countries: an ecological study
Source: PubMed Central journal article supplement — BMJ Open. 2021 Jun 16;11(6):e045981. doi: 10.1136/bmjopen-2020-045981 (PMC8211076; doi:10.1136/bmjopen-2020-045981), 2021-06-16
Supplement: bmjopen-2020-045981.draft_revisions.pdf [file bmjopen-2020-045981.draft_revisions.pdf]

# BMJ Open

BMJ Open is committed to open peer review. As part of this commitment we make the peer review history of every article we publish publicly available.

When an article is published we post the peer reviewers' comments and the authors' responses online. We also post the versions of the paper that were used during peer review. These are the versions that the peer review comments apply to.

The versions of the paper that follow are the versions that were submitted during the peer review process. They are not the versions of record or the final published versions. They should not be cited or distributed as the published version of this manuscript.

BMJ Open is an open access journal and the full, final, typeset and author-corrected version of record of the manuscript is available on our site with no access controls, subscription charges or pay-per-view fees (<http://bmjopen.bmj.com>).

If you have any questions on BMJ Open's open peer review process please email [info.bmjopen@bmj.com](mailto:info.bmjopen@bmj.com)

# BMJ Open

## A Review of Children's Surgery in the National Health Plans of 124 countries: A Call for Inclusion into National Surgical, Obstetric, and Anesthesia Plans

|                               |                                                                                                                                                                                                                                                                                                                                                                                                                                                                                                                                                                                                                                                                                                                                                                                                                                                                                                                                                                                                                                                                                                                                                                                                  |
|-------------------------------|--------------------------------------------------------------------------------------------------------------------------------------------------------------------------------------------------------------------------------------------------------------------------------------------------------------------------------------------------------------------------------------------------------------------------------------------------------------------------------------------------------------------------------------------------------------------------------------------------------------------------------------------------------------------------------------------------------------------------------------------------------------------------------------------------------------------------------------------------------------------------------------------------------------------------------------------------------------------------------------------------------------------------------------------------------------------------------------------------------------------------------------------------------------------------------------------------|
| Journal:                      | <i>BMJ Open</i>                                                                                                                                                                                                                                                                                                                                                                                                                                                                                                                                                                                                                                                                                                                                                                                                                                                                                                                                                                                                                                                                                                                                                                                  |
| Manuscript ID                 | bmjopen-2020-045981                                                                                                                                                                                                                                                                                                                                                                                                                                                                                                                                                                                                                                                                                                                                                                                                                                                                                                                                                                                                                                                                                                                                                                              |
| Article Type:                 | Original research                                                                                                                                                                                                                                                                                                                                                                                                                                                                                                                                                                                                                                                                                                                                                                                                                                                                                                                                                                                                                                                                                                                                                                                |
| Date Submitted by the Author: | 19-Oct-2020                                                                                                                                                                                                                                                                                                                                                                                                                                                                                                                                                                                                                                                                                                                                                                                                                                                                                                                                                                                                                                                                                                                                                                                      |
| Complete List of Authors:     | Landrum, Kelsey; Duke University, Global Health Institute Cotache-Condor, Cesia; Baylor University, Department of Public Health<br>Liu, Yingling; Baylor University, Department of Sociology<br>Truche, Paul; Harvard Medical School, Program in Global Surgery and Social Change<br>Robinson, Julia; Baylor University, Department of Public Health<br>Thompson, Nealey; Baylor University, Department of Public Health<br>Granzin, Ryann; Baylor University, Department of Public Health<br>Ameh, Emmanuel; National Hospital, Abuja, ; National Hospital, Abuja, Nigeria, Division of Paediatric Surgery<br>Bickler, Steve; Rady Children's Hospital San Diego, Division of Pediatric Surgery; University of California San Diego, Department of Surgery<br>Samad, Lubna; Indus Hospital, Department of Pediatric Surgery<br>Meara, John; Boston Children's Hospital, Plastic and Oral Surgery; Harvard Medical School, Program in Global Surgery and Social Change<br>Rice, Henry; Duke University, Global Health Institute; Duke University Medical Center, Department of Surgery<br>Smith, Emily; Baylor University, Department of Public Health; Duke University, Global Health Institute |
| Keywords:                     | Health policy < HEALTH SERVICES ADMINISTRATION & MANAGEMENT, PAEDIATRICS, SURGERY                                                                                                                                                                                                                                                                                                                                                                                                                                                                                                                                                                                                                                                                                                                                                                                                                                                                                                                                                                                                                                                                                                                |
|                               |                                                                                                                                                                                                                                                                                                                                                                                                                                                                                                                                                                                                                                                                                                                                                                                                                                                                                                                                                                                                                                                                                                                                                                                                  |

SCHOLARONE™  
Manuscripts

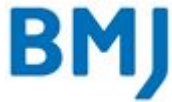

I, the Submitting Author has the right to grant and does grant on behalf of all authors of the Work (as defined in the below author licence), an exclusive licence and/or a non-exclusive licence for contributions from authors who are: i) UK Crown employees; ii) where BMJ has agreed a CC-BY licence shall apply, and/or iii) in accordance with the terms applicable for US Federal Government officers or employees acting as part of their official duties; on a worldwide, perpetual, irrevocable, royalty-free basis to BMJ Publishing Group Ltd ("BMJ") its licensees and where the relevant Journal is co-owned by BMJ to the co-owners of the Journal, to publish the Work in this journal and any other BMJ products and to exploit all rights, as set out in our [licence](#).

The Submitting Author accepts and understands that any supply made under these terms is made by BMJ to the Submitting Author unless you are acting as an employee on behalf of your employer or a postgraduate student of an affiliated institution which is paying any applicable article publishing charge ("APC") for Open Access articles. Where the Submitting Author wishes to make the Work available on an Open Access basis (and intends to pay the relevant APC), the terms of reuse of such Open Access shall be governed by a Creative Commons licence – details of these licences and which [Creative Commons](#) licence will apply to this Work are set out in our licence referred to above.

Other than as permitted in any relevant BMJ Author's Self Archiving Policies, I confirm this Work has not been accepted for publication elsewhere, is not being considered for publication elsewhere and does not duplicate material already published. I confirm all authors consent to publication of this Work and authorise the granting of this licence.

1  
2  
3 **A Review of Children's Surgery in the National Health Plans of 124 countries: A Call for**  
4 **Inclusion into National Surgical, Obstetric, and Anesthesia Plans**  
5  
6

7 Kelsey Landrum<sup>1</sup>, Cesia Cotache-Condor<sup>2</sup>, Yingling Liu<sup>3</sup>, Paul Truche<sup>4</sup>, Julia Robinson<sup>2</sup>, Nealey  
8 Thompson<sup>2</sup>, Ryan Granzin<sup>2</sup>, Emmanuel A. Ameh<sup>5</sup>, Steve W. Bickler<sup>6</sup>, Lubna Samad<sup>7</sup>, John Meara<sup>4,8</sup>,  
9 Henry E Rice<sup>1</sup>, Emily R Smith<sup>1,2</sup>, on behalf of the Global Initiative for Children's Surgery  
10  
11  
12  
13

14  
15 <sup>1</sup> Duke Global Health Institute, Duke University, Durham, NC, USA; <sup>2</sup> Department of Public Health,  
16 Robbins College of Health and Human Sciences, Baylor University, Waco, TX, USA; <sup>3</sup> Department of  
17 Sociology, College of Arts and Sciences, Baylor University, Waco, TX, USA; <sup>4</sup> Program in Global  
18 Surgery and Social Change, Harvard Medical School, Boston, USA; <sup>5</sup> Division of Pediatric Surgery,  
19 Department of Surgery, National Hospital, Abuja, Nigeria; <sup>6</sup> Division of Pediatric Surgery, Rady  
20 Children's Hospital San Diego, Department of Surgery, University of California San Diego, San Diego,  
21 CA; <sup>7</sup> Department of Pediatric Surgery, Center for Essential Surgical and Acute Care, Global Health  
22 Directorate, Indus Health Network, Karachi, Pakistan, The Indus Hospital, Karachi, Pakistan; <sup>8</sup> Boston  
23 Children's Hospital, Boston, MA, USA.  
24  
25  
26  
27  
28  
29  
30  
31  
32

33 Kelsey Landrum and Cesia Cotache-Condor contributed equally to this paper.  
34  
35  
36  
37

38 **Word Count: 2,482**  
39  
40  
41  
42

43 **Corresponding author:**  
44

45 Emily R Smith, PhD.  
46

47 Robbins College of Health and Human Sciences, Baylor University  
48

49 1621 S. 5th Street  
50

51 Waco, TX 76706  
52

53 Emily\_R\_Smith@baylor.edu | +1-254-710-4028  
54  
55  
56  
57  
58  
59  
60

## ABSTRACT

**Objectives:** This study aims to evaluate the priority given to surgical care for children within National Health Policies, Strategies, and Plans (NHPSPs).

**Participants and setting:** We reviewed the World Health Organization's (WHO) Country Planning Cycle Database for NHPSPs existing for 146 countries. Countries with NHPSPs in languages different from English, Spanish, or French were excluded. A total of 124 countries met the inclusion criteria.

**Primary and secondary outcome measures:** We searched for child-specific and surgery-specific terms in the NHPSP's missions, goals, and strategies using three analytic approaches: 1) count of the total number of mentions, 2) count of the number of policies with no mentions, and 3) count of the number of policies with five or more mentions. Outcomes were compared across WHO regional and World Bank income-level classifications.

**Results:** We found that the most frequently mentioned terms were "child\*", "infant\*", and "immuniz\*". The most frequently mentioned surgery term was "surg\*". Overall, 45% of NHPSPs discussed surgery and 7% discussed children's surgery. Child-specific terms were more frequently mentioned than procedure-specific terms. The majority (93%) of countries did not mention selected essential and cost-effective children's procedures. When stratified by WHO region, the African and the West Pacific regions most frequently discussed children's surgical care. When stratified by World Bank income level, low-income countries and lower-middle-income countries most frequently discussed pediatric surgery. However, in both stratifications, pediatric surgery only equated to less than 1% when compared to other terms.

**Conclusion:** The low prevalence of children's surgical search terms in NHPSPs indicates that children's surgical disease coverage in National Surgical, Obstetric, and Anesthesia Plans (NSOAPs) remains low. Increased awareness of children's surgical needs in national health plans is critical to improving children's health around the world and supporting universal health coverage for children.

**Keywords:** Pediatric Surgery, NSOAP, Universal Health Coverage

### Strengths and limitations of the study

- This study uses national health plans as strong indicators to evaluate the level of priority given to pediatric surgical care in 124 countries.
- Our results highlight an important and drastically under-reported issue regarding the neglect of pediatric surgical disease in global health.
- National health plans were not available for 48 countries. Most of these countries belong to Europe and Americas regions and high-income and upper- middle income status.
- 27 national health plans in languages different from English, Spanish and French were not assessed. Most of these health plans belonged to European, and high-income and upper-middle income status.

## INTRODUCTION

Worldwide an estimated 1.7 billion children and adolescents, predominantly from low- and middle-income countries (LMICs) lack access to safe, affordable, and timely surgical and anesthesia care.[1] Although surgery has gained increased awareness in the global health agenda in recent years,[2-4] surgery for children has received less attention. The burden of surgical disease among children in LMICs is high, with 15-20% of children in LMICs having surgically amenable conditions.[5-11] In addition, the consequences of untreated surgical conditions for children include life-long disabilities and social stigmatization.[5 9 12-25] National investments in surgical care for children are needed to improve the health of children in line with the goals of universal health coverage (UHC). [6 7 19 21 26] National Health Policies, Strategies and Plans (NHPSPs) are country-level frameworks to design and operate complex health systems, and are critical to align national strategies, policies, and goals for population health.[27] NHPSPs bring together stakeholders from across national and sub-national levels to develop a health system in line with national political, socio-economic, and historic complexities. NHPSPs are developed through cooperation with the World Health Organization (WHO) and facilitate definition and support of national priorities.[28] In addition, NHPSPs are vital to moving towards UHC, strengthening health systems, and improving effectiveness of international aid.[29]

Designing country-level plans within a NHPSP framework is recommended to each WHO Member State.[30] Of the 194 Member States, 155 countries have updated a NHPSP in the last 5 years, with 75% aimed at moving towards UHC.[27] NHPSPs is a strong measure of each country's priority to specific health conditions, and can help assess if surgical care is incorporated into national plans. A number of countries have recognized a lack of policy level strategy for improving surgical care. Eight countries have developed specific National Surgical, Obstetric, and Anesthesia Plans (NSOAPs) to address the gap in national strategic planning for improved access to surgical care.[31-33]

The Global Initiative for Children's Surgery (GICS) is a collaboration of over 150 providers from around the world committed to improving children's surgical care. GICS has developed guidelines in the Optimal Resources for Children's Surgery (OReCS) document to support the provision of care at every healthcare level based on infrastructure, service delivery, training, and research. [21 26 34 35] Utilizing the OReCS document in partnerships with international and national governing bodies may increase prioritization of children's surgical care in national health policies. Our study expands our understanding of prioritization of children's surgical care in national health policy and strategies. As

1  
2  
3 such, this study aimed to evaluate the level of priority given to surgical care for children within  
4 NHPSPs and provide recommendations on aligning these plans with the use of NSOAPs in LMICs.  
5  
6  
7

## 8 9 **METHODS**

10  
11 In the context of this manuscript, priority given to pediatric surgical care at a national level was  
12 defined as the inclusion of surgery-specific terms for children in the countries' NHPSPs. From 194  
13 WHO Member States, 146 countries had NHPSPs available in the WHO's Country Planning Cycle  
14 Database.[36] All 146 NHPSPs were assessed for eligibility. Inclusion criteria included publication  
15 in English, Spanish, or French as these are part of the six WHO's official languages.[37] NHPSPs  
16 written in Russian and Arabic were not included due to a lack of resources to address these  
17 languages. No NHPSP was written in Chinese. Twenty-two NHPSPs were excluded because of being  
18 written in other languages. The vast majority of these NHPSPs were written in languages not  
19 included as part of the six WHO's official languages. In total, 124 NHPSPs were included in this  
20 review (**Figure 1, Supplemental material 1**).  
21  
22  
23  
24  
25  
26  
27

28 From September to October 2019, five investigators searched each country's NHPSPs mission,  
29 vision, goals, or strategies using 17 search terms related to child health and surgery-specific issues  
30 (Table 1). The terms selected terms were translated into Spanish by one of the coauthors who is a  
31 native speaker. The terms in French were established by the investigators and were validated by a  
32 native speaker health professional with expertise in global surgery (LMK) outside of the group of  
33 coauthors. The variations of the terms included for Spanish and French not always had an exact  
34 equivalent in English. **Supplemental material 2** includes a complete list of terms in the three  
35 languages assessed in this study.  
36  
37  
38  
39  
40  
41

42 Each NHPSP PDF file was searched using the search function for each term and subsequently  
43 counted by frequency. Search terms were selected based on a review of existing surgical and child  
44 health literature and international and national health policy reports. Specifically, search terms were  
45 chosen as common terms used in the current global surgery literature.[2 7 12] As well, we included  
46 the terms "circumcision", "open fracture fixation", and "inguinal hernia," as these are three most  
47 commonly performed and cost-effective children's surgical procedures.[21] We followed three  
48 different analytic approaches for each search term. First, we counted the total number of mentions of  
49 each search term. Second, we counted the number of policies that have no mention of any search  
50 term. Third, we counted the number of policies with 5 or more mentions for each search term. The  
51  
52  
53  
54  
55  
56  
57  
58  
59  
60



1  
2  
3 indicator of at least five mentions was established as a significant number following previous  
4 literature that evaluates the inclusion of surgery in African countries' health plans.[38] All data were  
5 stored in Microsoft Excel.  
6  
7

8 The NHPSPs were stratified according to the WHO regional divisions in the African region (AF),  
9 region of the Americas (AM), Eastern Mediterranean region (EM), South-East Asia region (SEA),  
10 European region (EU), and Western Pacific region (WP) to analyze geographic patterns countries.  
11 Likewise, the NHPSPs were stratified according to the World Bank's Fiscal Year 2019 income  
12 classification.[39] Descriptive statistics were performed in Microsoft Excel and used to analyze  
13 patterns in inclusion of search terms in NHPSPs among countries.  
14  
15  
16  
17

18 **Ethical approval:** This study does not involve human participants. Therefore, research approval was  
19 not applicable.  
20  
21  
22

### 23 **Patient and Public Involvement**

24 It was not appropriate or possible to involve patients or the public in the design, or conduct, or  
25 reporting, or dissemination plans of our research.  
26  
27  
28  
29  
30

## 31 **RESULTS**

32 From a total of 124 NHPSPs, the word roots "surg\*" and "pediatric surgery" were mentioned at least  
33 once in 45% and 7% of NHPSPs, respectively (**Table 1**). Only 11% of NHPSPs mentioned "surg\*"  
34 more than five times and no NHPSP mentioned "pediatric surgery" more than five times. In  
35 comparison, over 50% of NHPSPs mentioned other common child-specific issues such as  
36 "immuniz\*" (60% of NHPSPs), "infant" (39%), or "malnutrition" (54%). On average, "immuniz\*"  
37 was 8 times more likely to mentioned than "pediatric surgery".  
38  
39  
40  
41  
42  
43

44 The term with the most mentions was "child\*" with 2,142 mentions, followed by the terms "infant"  
45 and "immuniz\*" with 285 (8%) and 280 (7%) mentions, respectively. Sixty-eight (55%) NHPSPs did  
46 not mention "surg\*". Terms mentioning specific procedures were the least likely to be mentioned  
47 including "circumcision" (7%), "open fracture fixation" (2%), and "inguinal hernia" (0%). Except  
48 from "inguinal hernia" (which had no mentions), from a regional perspective, these procedures were  
49 only mentioned in the West Pacific region, South East Asia region and African Region.  
50  
51  
52  
53  
54  
55  
56  
57  
58  
59  
60

**Table 1.** Search terms in English, French, and Spanish with frequency of mentions and proportions of policies with no mentions, at least one mention and more than five mentions.

| Search Terms English     | Search Terms French                                              | Search Terms Spanish         | Total Mentions<br>n (%)<br>3783 (100) | Number of policies with <b>no</b> mentions of term<br>n (%)<br>124 (100) | Number of policies with <b>at least 1</b> mention of term<br>n (%)<br>124 (100) | Number of policies with <b>5 or more</b> mentions of term<br>n (%)<br>124 (100) |
|--------------------------|------------------------------------------------------------------|------------------------------|---------------------------------------|--------------------------------------------------------------------------|---------------------------------------------------------------------------------|---------------------------------------------------------------------------------|
| <b>Surgery-specific</b>  |                                                                  |                              |                                       |                                                                          |                                                                                 |                                                                                 |
| surg* <sup>a</sup>       | chirurgi*                                                        | cirug* / ciruj* / quirurgic* | 269 (7.1)                             | 68 (54.8)                                                                | 56 (45.2)                                                                       | 14 (11.3)                                                                       |
| injury                   | blessure*                                                        | lesion*                      | 155 (4.1)                             | 80 (64.5)                                                                | 44 (35.5)                                                                       | 9 (7.3)                                                                         |
| trauma                   | traumat*                                                         | trauma*                      | 102 (2.7)                             | 88 (71.0)                                                                | 36 (29.0)                                                                       | 6 (5.8)                                                                         |
| operation                | operation / intervention                                         | operacion*                   | 75 (2.0)                              | 90 (72.6)                                                                | 18 (14.5)                                                                       | 5 (4.8)                                                                         |
| operative                | opérateur                                                        | operativo*                   | 32 (0.8)                              | 109 (87.9)                                                               | 14 (11.3)                                                                       | 3 (2.4)                                                                         |
| operating                | opérateur / opérant                                              | N/A                          | 28 (0.7)                              | 80 (64.5)                                                                | 12 (9.7)                                                                        | 2 (1.6)                                                                         |
| open fracture fixation   | fixation de fracture ouverte / ostéosynthèse de fracture ouverte | fijación de fractura abierta | 3 (0.1)                               | 121 (97.6)                                                               | 3 (2.4)                                                                         | 0 (0.0)                                                                         |
| inguinal hernia          | hernie inguinale                                                 | hernia inguinal              | 0 (0.0)                               | 124 (100.0)                                                              | 0 (0.0)                                                                         | 0 (0.0)                                                                         |
| pediatric surgery        | chirurgie pédiatrique                                            | cirujía pediátrica           | 9 (0.2) <sup>f</sup>                  | 115 (92.7)                                                               | 9 (7.3)                                                                         | 0 (0.0)                                                                         |
| <b>Children-specific</b> |                                                                  |                              |                                       |                                                                          |                                                                                 |                                                                                 |
| child* <sup>b</sup>      | enfant* / naissance                                              | niñ*                         | 2142 (56.6)                           | 16 (12.9)                                                                | 108 (87.1)                                                                      | 85 (68.5)                                                                       |
| immuniz* <sup>c</sup>    | immunis* / vaccin*                                               | vacuna* inmuniz*             | 280 (7.4)                             | 50 (40.3)                                                                | 74 (59.7)                                                                       | 19 (15.3)                                                                       |
| infant                   | bébé / infant*                                                   | infant*                      | 285 (7.5)                             | 48 (38.7)                                                                | 76 (61.3)                                                                       | 21 (16.9)                                                                       |
| malnutrition             | malnutrition                                                     | desnutricion                 | 242 (6.4)                             | 67 (54.0)                                                                | 57 (46.0)                                                                       | 17 (13.7)                                                                       |
| stunt* <sup>d</sup>      | retard de croissance                                             | retraso en el crecimiento    | 67 (1.8)                              | 89 (71.8)                                                                | 35 (28.2)                                                                       | 4 (3.2)                                                                         |
| pedia* <sup>e</sup>      | pédiatr*                                                         | pedia*                       | 44 (1.2)                              | 101 (81.5)                                                               | 23 (18.5)                                                                       | 1 (0.8)                                                                         |
| wasting                  | dépérissement                                                    | anemia                       | 33 (0.9)                              | 106 (85.5)                                                               | 18 (14.5)                                                                       | 1 (0.8)                                                                         |
| circumcision             | circoncision / posthectomie                                      | Circuncisión                 | 17 (0.4)                              | 115 (92.7)                                                               | 9 (7.3)                                                                         | 0 (0.0)                                                                         |

For simplicity in the remaining text of this paper only English terms will be used to describe the statistics revealed by both English and French and Spanish search terms.

<sup>a</sup> *surg\** includes surgery, surgeries, surgical, neurosurgery, and surgeon. <sup>b</sup> *child\** includes child, children, childbearing, childbirth, and childhood. <sup>c</sup> *immuniz\** includes immunization, and immunized. <sup>d</sup> *stunt\** includes stunting. <sup>e</sup> *pedia\** includes pediatric and pediatrics. <sup>f</sup> Mentions of "pediatric surgery" were found in NHPSPs from Uganda, Democratic Republic of Congo, Congo, Chile, Tajikistan, Cambodia, China, Cook Islands, and Vietnam.

1  
2  
3 When stratified by region, the African region (63%) had the highest frequency of mentions for  
4 "surg\*", which equates to 7% of the total mentions for this region (**Figure 2**). Nine countries,  
5 including Congo, Uganda, Democratic Republic of Congo, Chile, Tajikistan, Cambodia, China, Cook  
6 Islands, and Vietnam mentioned "pediatric surgery" in their NHPSPs. The West Pacific region (44%)  
7 and the African region (33%) had the most frequent mentions of "pediatric surgery" and, when  
8 combined, make up to 77% of mentions for this search term. However, when compared to other  
9 terms, "pediatric surgery" only equates to 0.8% and 0.1% of total search term mentions in these  
10 regions, respectively. The Eastern Mediterranean region and the South East Asia region had no  
11 mentions of "pediatric surgery" in their NHPSPs (**Supplemental material 3**).

12  
13  
14  
15  
16  
17  
18 When stratified by income levels, LICs had the highest frequency of mentions for "surg\*" (45%),  
19 which equates to 8% of the total mentions for this economic group (**Figure 3**). NHPSPs from LICs  
20 (33%) and LMICs (33%) concentrated the majority of mentions for "pediatric surgery" and combined  
21 make up to 66% of mentions for this term. However, when compared to other terms, "pediatric  
22 surgery" only equates to 0.2% and 0.3% of total search term mentions in these economic groups,  
23 respectively (**Supplemental material 3**).

## 30 31 **DISCUSSION**

32  
33 Inclusion of children's surgical care coverage in NHPSPs and NSOAPs is improving the health of  
34 children and alignment of surgical care with UHC frameworks.[40-42] Our study provides evidence  
35 that the financing of surgical care for children and penetration of UHC policies for surgical coverage  
36 for children in NHPSPs is quite limited, with only 8% of national health plans addressing children's  
37 surgical needs specifically. Given that children's surgical care requires a unique set of workforce and  
38 infrastructure, this gap in inclusion of surgical needs for children is an opportunity to define  
39 children's surgical care as a part of national essential benefits packages.

40  
41  
42  
43  
44  
45 Surgical care was more frequently discussed within NHPSPs in the Africa region in comparison to  
46 other regions. The European region NHPSPs had the lowest frequency of surgical-specific terms.  
47 This finding could reflect the number of countries, particularly in the WHO Africa region, that have  
48 created NSOAPs.[32] The Western Pacific region most frequently mentioned "pediatric surgery,"  
49 despite a lack of NSOAPs in that region. As well, the Western Pacific region used language  
50 including "operation" more frequently than other regions, a finding that could indicate a lack of  
51 international consensus on NSOAP language. The Western Pacific region has had a long-standing  
52  
53  
54  
55  
56  
57  
58  
59  
60

1  
2  
3 collaborative partnership in surgical training and provision of specialist surgical services in the  
4 region with the Royal Australasian College of Surgeons. Over the first 15 years of the partnership,  
5 operations done by trainees increased from 10% to 77% and nurse anesthetists were trained and  
6 deployed in each hospital.[43] In addition, collaborations between nations has recently resulted in 13  
7 of the 14 countries collectively measuring the first four Lancet Commission global surgery  
8 indicators.[44] This type of collaborative partnerships could serve as key examples of integrating  
9 surgical care on national levels.  
10  
11  
12  
13  
14

15 When stratified by income level, LICs were most likely to mention surgery specific search terms in  
16 addition to children-specific search terms compared to HICs, a finding consistent with the increasing  
17 number of LICs that are developing NSOAPs. Overall, however, the low frequency of children-  
18 specific surgical procedures could be reflective of a lack of global consensus on defining essential  
19 surgical procedures for children. This finding suggests an opportunity to define surgical procedures  
20 for children such that future NHPSPs and NSOAPs can target prevalent surgical conditions and cost-  
21 effective care to improve the health of children in national UHC goals. This has partially been done  
22 with the latest edition of the *Disease Control Priorities 3*, mainly for congenital conditions.[40]  
23  
24  
25  
26  
27  
28

29 Although surgical conditions are high burden for children in many LMICs, a list of cost-effective,  
30 essential surgical procedures for children needs to be defined if children's surgical procedures are to  
31 be included in NHPSPs and NSOAPs. Although this list has not been defined for children's surgery,  
32 the OReCS document outlines a multi-faceted strategy for integrating procedure-specific surgical  
33 care for children into NSOAPs. The document is designed in the form of a template to guide  
34 planning at all healthcare levels to provide safe and high-quality surgical care for children. The utility  
35 of the OReCS document in conjunction with national child health policy plans, NHPSPs, and  
36 NSOAPs could serve as a starting point for integrating child-specific surgical care into existing or  
37 developing plans.  
38  
39  
40  
41  
42  
43

44 Nigeria can serve as an example of successfully integrating the OReCS document with NSOAPS and  
45 NHPSPs through the lens of UHC (**Figure 4**). Nigeria's robust development of a national surgical  
46 plan is integrated into the national health plan and specifically includes the provision and  
47 strengthening of children and adolescents surgical care within the existing healthcare systems. This  
48 model highlights the utility of using national plans that can address multiple sectors of surgical  
49 delivery in a coordinated manner. Due to the subspecialized nature of children's surgical care,  
50 organized referral systems, specialized centers, and specialized workforce are required  
51 simultaneously for optimal outcomes.  
52  
53  
54  
55  
56  
57  
58  
59  
60

1  
2  
3 The OReCS document serves as a specific guide to scale-up surgical care in an organized manner by  
4 addressing all levels of healthcare in the country including referral systems and workforce expansion.  
5  
6 Going forward, the success of Nigeria's integration of children's surgical care within national health  
7  
8 plans can serve as a template for other countries to follow.  
9

10 Surgically amenable conditions will increasingly impact children around the world, as over a quarter  
11 of the global population is under fifteen years of age and approximately 50% of the population in  
12 LICs are under the age of 15.[41 42] Inclusion of children's surgical policies in NHPSPs and WHO  
13 regional health plans is critical to meeting the United Nation's Strategic Development Goals (SDG)-3  
14 goals of achieving 80% coverage of essential healthcare services while protecting 100% of patients  
15 from impoverishing and catastrophic health expenditures.[45]  
16  
17  
18  
19

### 20 **Limitations**

21  
22 Our study limitations include being unable to locate NHPSPs for all countries on the WHO Country  
23 Planning Cycle Database. Of the 48 countries not included, 73% were from HICs or UMICs which  
24 may have biased the results as HICs and UMICs were less likely to report surgical-specific and child-  
25 specific search terms than LICs or LMICs. Additionally, our study excluded 22 NHPSPs written in  
26 languages other than English, Spanish, and French. Of the 22 studies, 91% were from HICs or  
27 UMICs. We also used limited search terms to assess inclusion of children's surgery in the NHPSP  
28 reviews, potentially underestimating the number of plans with surgical care embedded. Although this  
29 occurrence may be small as we searched for the major terms of surg\* and ped\*, there is a possibility  
30 of missing key terms. Deeper analyses of NHPSPs through additional search terms and other  
31 qualitative approaches may provide a more robust and thorough search through the plans. Finally,  
32 NHPSPs represent only one part of UHC schemes. Further study on national budget and healthy  
33 policy literature and documents is important in defining the penetration of UHC schemes on surgical  
34 care provision for children at national health system levels.  
35  
36  
37  
38  
39  
40  
41  
42  
43

### 44 **Conclusion**

45  
46 We have an opportunity to incorporate children's surgical care as part of national health plans and  
47 impact children around the world. Inclusion of surgical care for children in national health policy  
48 frameworks is essential to reducing surgical disease morbidity and mortality in this population, and  
49 our study results in the following key policy recommendations for Member States:  
50  
51  
52

- 53  
54 1. Countries should use the Global Initiative for Children's Surgery's Optimal Resources for  
55 Children's Surgery (OReCS) guidelines to assess the current state of surgical care for children  
56  
57  
58

1  
2  
3 across multiple health system perspectives and facilitate collaboration with a broad range of  
4 health policy and children's surgery stakeholders.

- 5  
6  
7 2. Individual countries should define an essential package of children's surgical care across all  
8 specialties based on country-level surgical needs for children using language consistent  
9 across Member States.
- 10  
11 3. Inclusion of children's surgical needs in WHO NHPSPs and NSOAPs should be prioritized in  
12 order to address country-level surgical needs for children.  
13  
14  
15  
16  
17  
18  
19  
20  
21  
22  
23  
24  
25  
26  
27  
28  
29  
30  
31  
32  
33  
34  
35  
36  
37  
38  
39  
40  
41  
42  
43  
44  
45  
46  
47  
48  
49  
50  
51  
52  
53  
54  
55  
56  
57  
58  
59  
60

**Author contributorship:**

Conceptualization: ERS, HR, KL, CCC, YL, JR, NT, RG; Methodology: ERS, HR, KL, CCC, YL, JR, NT, RG; Data collection: CCC, YL, JR, NT, RG; Formal analysis and investigation: CCC; Writing - original draft preparation: ERS, KL, CCC, YL; Writing - review and editing: ERS, KL, CCC, PT, EAA, SWB, LS, JM, HR; Supervision: ERS.

**Competing Interests:** None declared.

**Funding:** None.

**Ethical approval:** This study does not involve human participants. Therefore, research approval was not applicable.

**Patient and Public Involvement**

It was not appropriate or possible to involve patients or the public in the design, or conduct, or reporting, or dissemination plans of our research

**Data sharing statement:** All data for this study are available in a public, open access repository.

**Acknowledgements:** We want to thank the Global Initiative for Children's Surgery (GICS) and the Center for Spatial Research at Baylor University for their support of this work. GICS ([www.globalchildrensurgery.org](http://www.globalchildrensurgery.org)) is a network of children's surgical and anesthesia providers from low-, middle-, and high-income countries collaborating for the purpose of improving the quality of surgical care for children globally. We also thank Dr. Luc Malemo Kalisya for his valuable contribution with the validation of the search terms and their variations in French.

1  
2  
3 **REFERENCES**  
4  
5  
6

- 7 1. Mullapudi B, Grabski D, Ameh E, et al. Estimates of number of children and adolescents without  
8 access to surgical care. *Bulletin of the World Health Organization* 2019;97(4):254-58. doi:  
9 10.2471/BLT.18.216028
- 10 2. Meara JGD, Leather AJMMS, Hagander LP, et al. Global Surgery 2030: evidence and solutions  
11 for achieving health, welfare, and economic development. *The Lancet* 2015;386(9993):569-  
12 624. doi: 10.1016/S0140-6736(15)60160-X
- 13 3. Botman M, Meester R, Voorhoeve R, et al. The Amsterdam Declaration on Essential Surgical  
14 Care. *World Journal of Surgery* 2015;39(6):1335-40. doi: 10.1007/s00268-015-3057-x
- 15 4. Price R, Makasa E, Hollands M. World Health Assembly Resolution WHA68.15: "Strengthening  
16 Emergency and Essential Surgical Care and Anesthesia as a Component of Universal Health  
17 Coverage"—Addressing the Public Health Gaps Arising from Lack of Safe, Affordable and  
18 Accessible Surgical and Anesthetic Services. *World Journal of Surgery* 2015;39(9):2115-25.  
19 doi: 10.1007/s00268-015-3153-y
- 20 5. Smith ER, Vissoci JRN, Rocha TAH, et al. Geospatial analysis of unmet pediatric surgical need in  
21 Uganda. *Journal of Pediatric Surgery* 2017;52(10):1691-98. doi:  
22 10.1016/j.jpedsurg.2017.03.045
- 23 6. Concepcion T, Mohamed M, Dahir S, et al. Prevalence of Pediatric Surgical Conditions Across  
24 Somaliland. *JAMA Network Open* 2019;2(1):e186857. doi:  
25 10.1001/jamanetworkopen.2018.6857
- 26 7. Butler EK, Tran TM, Nagarajan N, et al. Epidemiology of pediatric surgical needs in low-income  
27 countries. *PloS one* 2017;12(3):e0170968. doi: 10.1371/journal.pone.0170968
- 28 8. Butler E, Tran T, Fuller A, et al. Quantifying the pediatric surgical need in Uganda: results of a  
29 nationwide cross-sectional, household survey. *Pediatric Surgery International*  
30 2016;32(11):1075-85. doi: 10.1007/s00383-016-3957-3
- 31 9. Bearden A, Fuller AT, Butler EK, et al. Rural and urban differences in treatment status among  
32 children with surgical conditions in Uganda. *PloS one* 2018;13(11):e0205132. doi:  
33 10.1371/journal.pone.0205132 [published Online First: 2018/11/02]
- 34 10. Abdul-Mumin A, Anyomih TTK, Owusu SA, et al. Burden of Neonatal Surgical Conditions in  
35 Northern Ghana. *World Journal of Surgery* 2019 doi: 10.1007/s00268-019-05210-9
- 36  
37  
38  
39  
40  
41  
42  
43  
44  
45  
46  
47  
48  
49  
50  
51  
52  
53  
54  
55  
56  
57  
58  
59  
60



11. Abdelgadir J, Smith ER, Punchak M, et al. Epidemiology and Characteristics of Neurosurgical Conditions at Mbarara Regional Referral Hospital. *World Neurosurgery* 2017;102:526-32. doi: 10.1016/j.wneu.2017.03.019
12. Bickler SW, Rode H. Surgical services for children in developing countries. *Bulletin of the World Health Organization* 2002;80(10):829.
13. Nagarajan N, Gupta S, Shresthra S, et al. Unmet surgical needs in children: a household survey in Nepal. *Pediatric Surgery International* 2015;31(4):389-95. doi: 10.1007/s00383-015-3684-1
14. Yousef Y, Lee A, Ayele F, et al. Delayed access to care and unmet burden of pediatric surgical disease in resource-constrained African countries. *Journal of Pediatric Surgery* 2018;54(4):845-53. doi: 10.1016/j.jpedsurg.2018.06.018
15. Bickler SW, Kyambi J, Rode H. Pediatric surgery in sub-Saharan Africa. *Pediatric Surgery International* 2001;17(5-6):442-47. doi: 10.1007/s003830000516
16. Okoye M, Ameh E, Kushner A, et al. A Pilot Survey of Pediatric Surgical Capacity in West Africa. *World Journal of Surgery* 2015;39(3):669-76. doi: 10.1007/s00268-014-2868-5
17. Kushner A, Groen R, Kamara T, et al. Assessment of Pediatric Surgery Capacity at Government Hospitals in Sierra Leone. *World Journal of Surgery* 2012;36(11):2554-58. doi: 10.1007/s00268-012-1737-3
18. Lalchandani P, Dunn JCY. Global comparison of pediatric surgery workforce and training. *Journal of Pediatric Surgery* 2015;50(7):1180-83. doi: 10.1016/j.jpedsurg.2014.11.032
19. Smith ER, Concepcion TL, Mohamed M, et al. The contribution of pediatric surgery to poverty trajectories in Somaliland. *PloS one* 2019;14(7):e0219974. doi: 10.1371/journal.pone.0219974
20. Smith ER, van de Water BJ, Martin A, et al. Availability of post-hospital services supporting community reintegration for children with identified surgical need in Uganda. *BMC health services research* 2018;18(1) doi: 10.1186/s12913-018-3510-2
21. Saxton AT, Poenaru D, Ozgediz D, et al. Economic Analysis of Children's Surgical Care in Low- and Middle-Income Countries: A Systematic Review and Analysis. *PloS one* 2016;11(10):e0165480. doi: 10.1371/journal.pone.0165480 [published Online First: 2016/10/30]
22. Fuller AT, Haglund MM, Lim S, et al. Pediatric Neurosurgical Outcomes Following a Neurosurgery Health System Intervention at Mulago National Referral Hospital in Uganda. *World Neurosurgery* 2016;95:309-14. doi: 10.1016/j.wneu.2016.07.090

- 1  
2  
3 23. Concepcion TL, Smith ER, Mohamed M, et al. Provision of Surgical Care for Children Across  
4 Somaliland: Challenges and Policy Guidance. *World Journal of Surgery* 2019;43(11):2934.  
5 doi: 10.1007/s00268-019-05079-8  
6  
7  
8 24. Concepcion TL, Dahir S, Mohamed M, et al. Barriers to Surgical Care Among Children in  
9 Somaliland: An Application of the Three Delays Framework. *World Journal of Surgery*  
10 2020;44(6):1712-18. doi: 10.1007/s00268-020-05414-4 [published Online First: 2020/02/08]  
11  
12 25. Smith ER, Concepcion TL, Shrimel M, et al. Waiting Too Long: The Contribution of Delayed  
13 Surgical Access to Pediatric Disease Burden in Somaliland. *World Journal of Surgery*  
14 2020;44(3):656-64. doi: 10.1007/s00268-019-05239-w [published Online First: 2019/10/28]  
15  
16 26. Smith ER, Concepcion TL, Niemeier KJ, et al. Is Global Pediatric Surgery a Good Investment?  
17 *World Journal of Surgery* 2019;43(6):1450-55. doi: 10.1007/s00268-018-4867-4  
18  
19 27. World Health Organization. Supporting national health policies, strategies, plans 2020 [Available  
20 from: <https://www.who.int/activities/supporting-national-health-policies-strategies-plans>  
21 accessed February 14 2020.  
22  
23 28. United Nations. Sustainable Development Goals 2019 [Available from:  
24 <https://sustainabledevelopment.un.org/sdg3> accessed October 14, 2019.  
25  
26 29. World Health Organization. Strategizing national health in the 21st century: a handbook. In:  
27 Schmets G, Kadandale S, Porignon D, et al., eds., 2016.  
28  
29 30. World Health Organization. A framework for national health policies, strategies and plans, 2010.  
30  
31 31. Citron I, Jumbam D, Dahm J, et al. Towards equitable surgical systems: development and  
31 outcomes of a national surgical, obstetric and anaesthesia plan in Tanzania. *BMJ Global*  
32 *Health* 2019;4(2) doi: 10.1136/bmjgh-2018-001282  
33  
34 32. Paul T, Haitham S, Ché LR, et al. Globalization of national surgical, obstetric and anesthesia  
34 plans: the critical link between health policy and action in global surgery. *Global Health*  
35 2020;16(1):1-8. doi: 10.1186/s12992-019-0531-5  
36  
37 33. Peters A, Roa L, Rwamasirabo E, et al. National Surgical, Obstetric, and Anesthesia Plans  
37 Supporting the Vision of Universal Health Coverage. *Global Health: Science and Practice*  
38 2020;8:1.3-9. doi: 10.9745/GHSP-D-19-00314  
39  
40 34. Global Initiative for Children's Surgery. Optimal Resources for Children's Surgical Care:  
40 Executive Summary. *World Journal of Surgery* 2019;43(4):978-80. doi: 10.1007/s00268-  
41 018-04888-7  
42  
43  
44  
45  
46  
47  
48  
49  
50  
51  
52  
53  
54  
55  
56  
57  
58  
59  
60

- 1  
2  
3 35. Global Initiative for Children's Surgery. Global Initiative for Children's Surgery: A Model of  
4 Global Collaboration to Advance the Surgical Care of Children. *World Journal of Surgery*  
5 2019;43(6):1416-25. doi: 10.1007/s00268-018-04887-8 [published Online First: 2019/01/10]  
6  
7
- 8 36. World Health Organization. Country Planning Cycle Database 2019 [Available from:  
9 <http://www.nationalplanningcycles.org/planning-cycle/afg> accessed August 27, 2019.  
10
- 11 37. World Health Organization. Multilingualism and WHO 2020 [Available from:  
12 <https://www.who.int/about/who-we-are/multilingualism> accessed August 27, 2020.  
13
- 14 38. Citron I, Chokotho L, Lavy C. Prioritisation of Surgery in the National Health Strategic Plans of  
15 Africa: A Systematic Review. *World journal of surgery* 2015;40(4):779-83. doi:  
16 10.1007/s00268-015-3333-9  
17
- 18 39. World Bank. New World Bank GDP and poverty estimates for Somaliland 2014 [Available from:  
19 [https://www.worldbank.org/en/news/press-release/2014/01/29/new-world-bank-gdp-and-](https://www.worldbank.org/en/news/press-release/2014/01/29/new-world-bank-gdp-and-poverty-estimates-for-somaliland)  
20 [poverty-estimates-for-somaliland](https://www.worldbank.org/en/news/press-release/2014/01/29/new-world-bank-gdp-and-poverty-estimates-for-somaliland) accessed July 16, 2019.  
21  
22
- 23 40. Debas HT, Donkor P, Gawande A, et al. Disease Control Priorities, Third Edition : Volume 1.  
24 Essential Surgery: Washington, DC: World Bank 2015.  
25  
26
- 27 41. Population Reference Bureau. 2018 World Population Data Sheet With Focus on Changing Age  
28 Structures 2020 [Available from: [https://www.prb.org/2018-world-population-data-sheet-](https://www.prb.org/2018-world-population-data-sheet-with-focus-on-changing-age-structures/)  
29 [with-focus-on-changing-age-structures/](https://www.prb.org/2018-world-population-data-sheet-with-focus-on-changing-age-structures/) accessed February 14 2020.  
30  
31
- 32 42. Smith E, Concepcion T, Lim S, et al. Disability Weights for Pediatric Surgical Procedures: A  
33 Systematic Review and Analysis. *World Journal of Surgery* 2018;42(9):3021-34. doi:  
34 10.1007/s00268-018-4537-6  
35  
36
- 37 43. Guest GD, Scott DF, Xavier JP, et al. Surgical capacity building in Timor-Leste: a review of the  
38 first 15 years of the Royal Australasian College of Surgeons-led Australian Aid programme.  
39 *ANZ journal of surgery* 2017;87(6):436-40. doi: 10.1111/ans.13768 [published Online First:  
40 2016/09/21]  
41  
42
- 43 44. Guest GD, McLeod E, Perry WRG, et al. Collecting data for global surgical indicators: a  
44 collaborative approach in the Pacific Region. *BMJ Global Health* 2017;2(4):e000376-e76.  
45 doi: 10.1136/bmjgh-2017-000376  
46  
47
- 48 45. Boerma T, Eozenou P, Evans D, et al. Monitoring Progress towards Universal Health Coverage  
49 at Country and Global Levels. *PLoS medicine* 2014;11(9):e1001731. doi:  
50 10.1371/journal.pmed.1001731  
51  
52  
53  
54  
55  
56  
57  
58  
59  
60

1  
2  
3 **FIGURE LEGEND**  
4

5 **Figure 1.** Flowchart of data search process.  
6

7  
8 **Figure 2.** Percentages of search terms in English, French, and Spanish stratified by WHO's region.  
9

10  
11 **Figure 3.** Percentages of search terms in English, French, and Spanish stratified by World Bank's income  
12 classification level.  
13

14  
15  
16 **Figure 4.** Example of Nigeria: Inclusion of children's surgical care within national health plans.  
17  
18  
19  
20  
21  
22  
23  
24  
25  
26  
27  
28  
29  
30  
31  
32  
33  
34  
35  
36  
37  
38  
39  
40  
41  
42  
43  
44  
45  
46  
47  
48  
49  
50  
51  
52  
53  
54  
55  
56  
57  
58  
59  
60

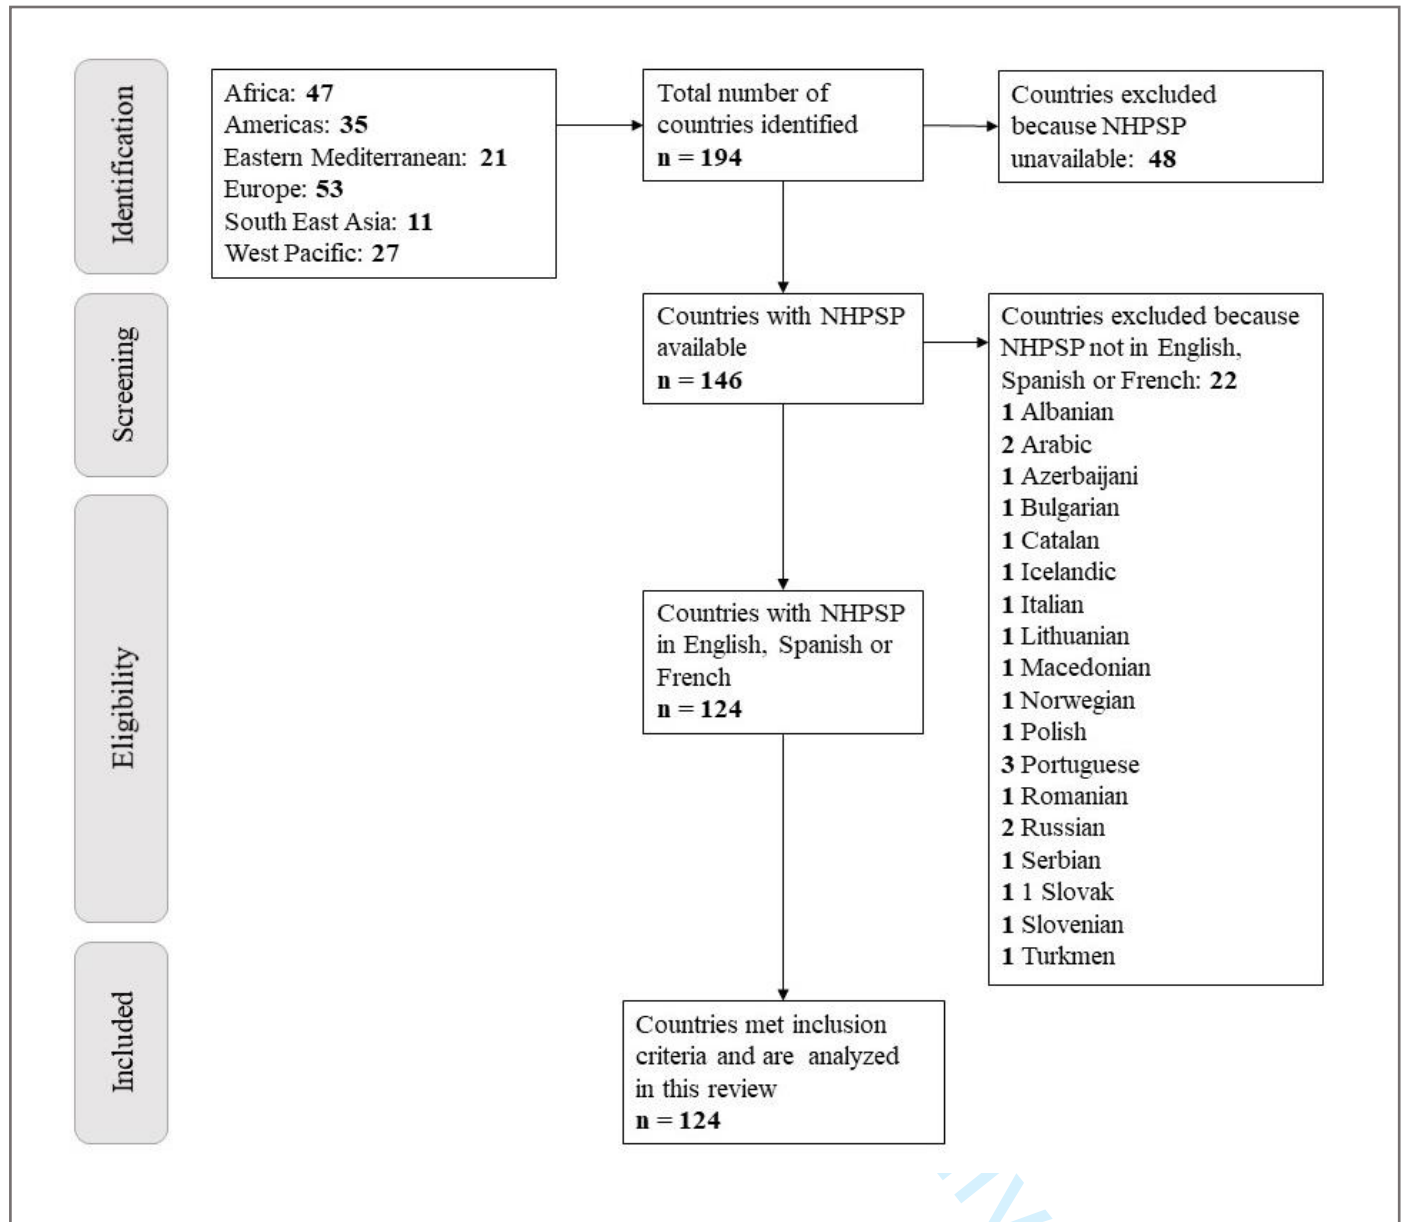

■ Africa ■ Americas ■ Eastern Mediterranean ■ Europe ■ South East Asia ■ West Pacific

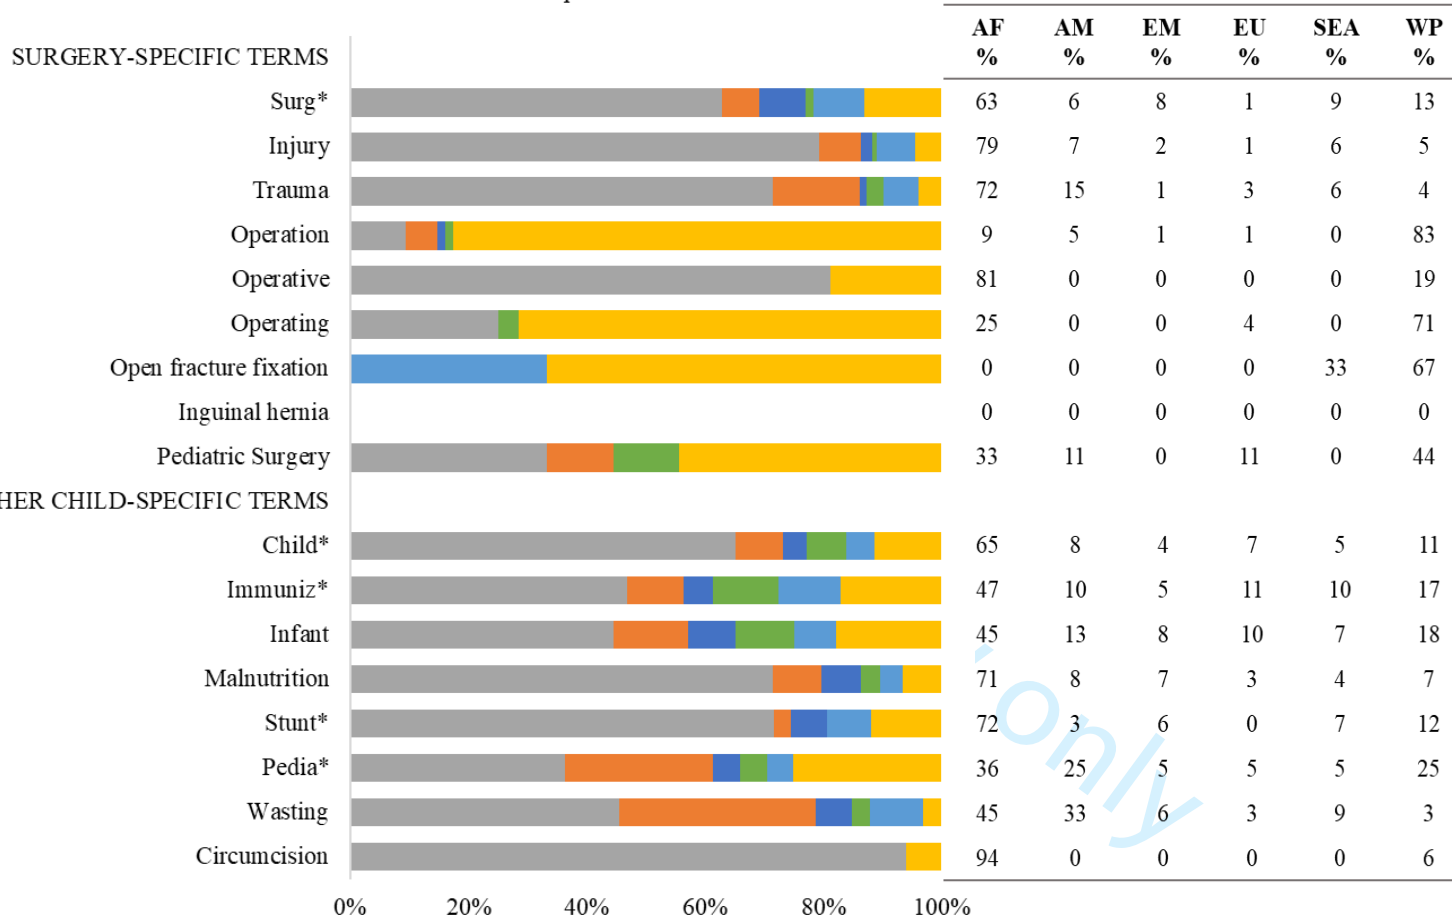

For simplicity, only the English terms are used to describe the aggregated statistics of English, Spanish, and French search terms.

<sup>a</sup> *surg\** includes surgery, surgeries, surgical, neurosurgery, and surgeon. <sup>b</sup> *child\** includes child, children, childbearing, childbirth, and childhood. <sup>c</sup> *immuniz\** includes immunization, and immunized. <sup>d</sup> *stunt\** includes stunting. <sup>e</sup> *pedia\** includes pediatric and pediatrics.

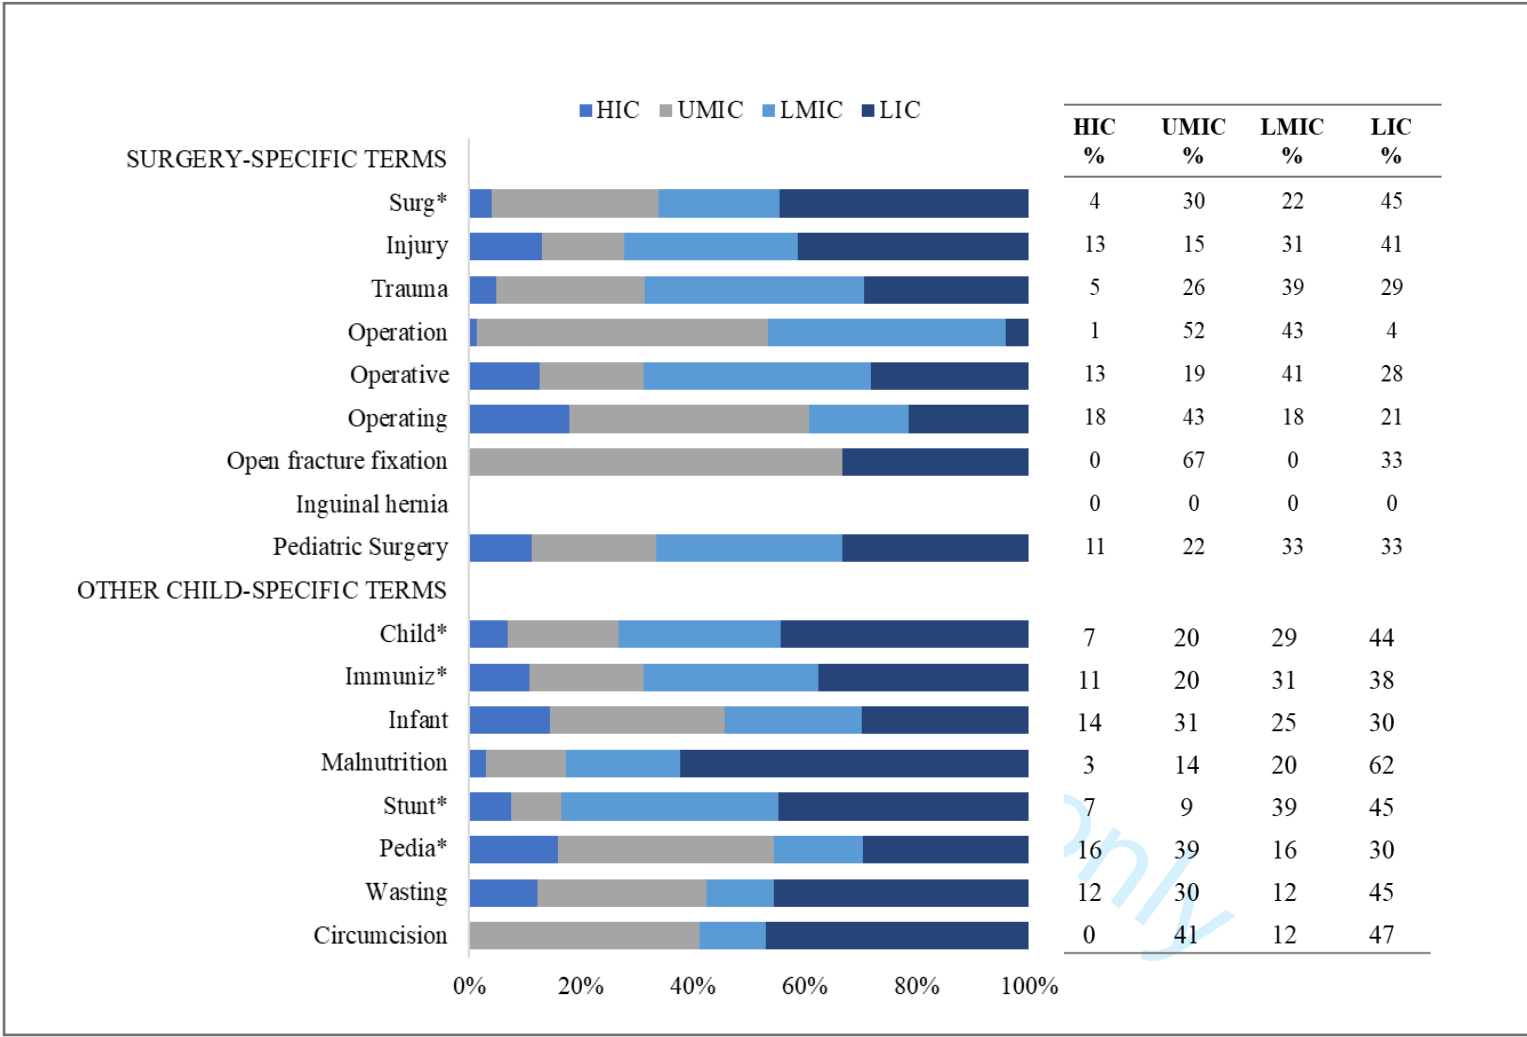

HIC=High Income Countries, UMIC=Upper-Middle-Income Countries, LMIC=Lower-Middle-Income Countries, LIC=Low Income Countries.

For simplicity, only the English terms are used to describe the aggregated statistics of English, Spanish, and French search terms.

<sup>a</sup> *surg\** includes surgery, surgeries, surgical, neurosurgery, and surgeon. <sup>b</sup> *child\** includes child, children, childbearing, childbirth, and childhood.

<sup>c</sup> *immuniz\** includes immunization, and immunized. <sup>d</sup> *stunt\** includes stunting. <sup>e</sup> *pedia\** includes pediatric and pediatrics.

1  
2  
3  
4  
5  
6  
7  
8  
9  
10  
11  
12  
13  
14  
15  
16  
17  
18  
19  
20  
21  
22  
23  
24  
25  
26  
27  
28  
29  
30  
31  
32  
33  
34  
35  
36  
37  
38  
39  
40  
41  
42  
43  
44  
45  
46  
47  
48  
49  
50  
51  
52  
53  
54  
55  
56  
57  
58  
59  
60

Recommendations include:

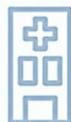

### INFRASTRUCTURE

Creation of one federal children's hospital.

Availability of a package of essential children's surgery at all healthcare levels, including the provision of specialized equipment and supplies.

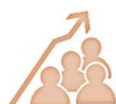

### WORKFORCE

Provision of specialized human resources for children's surgery.

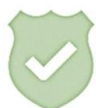

### SERVICE DELIVERY

Integrate and create efficient referral system for children's surgery.

Increase capacity of tertiary levels of care for advanced surgical care for children.

Availability of critical care and pre-hospital services.

Review only



**Supplemental material 1:** Country health plans stratified by WHO's region and World Bank's income classification level.

|                                               | <b>Total</b>       | <b>Excluded because<br/>NHPSP unavailable</b> | <b>Excluded because not in<br/>English, Spanish, or French</b> | <b>Total available<br/>for search</b> |
|-----------------------------------------------|--------------------|-----------------------------------------------|----------------------------------------------------------------|---------------------------------------|
|                                               | n (%)              | n (%)                                         | n (%)                                                          | n (%)                                 |
|                                               | <i>194 (100.0)</i> | <i>48 (100.0)</i>                             | <i>22 (100.0)</i>                                              | <i>124 (100.0)</i>                    |
| <b>WHO region</b>                             |                    |                                               |                                                                |                                       |
| Africa                                        | 47 (24.2)          | 7 (14.6)                                      | 2 (9.1)                                                        | 38 (30.6)                             |
| Americas                                      | 35 (18.0)          | 10 (20.8)                                     | 1 (4.5)                                                        | 24 (19.4)                             |
| Eastern Mediterranean                         | 21 (10.8)          | 7 (15.6)                                      | 2 (9.1)                                                        | 12 (9.7)                              |
| Europe                                        | 53 (27.3)          | 17 (35.4)                                     | 17 (77.3)                                                      | 19 (15.3)                             |
| South East Asia                               | 11 (5.7)           | 3 (6.3)                                       | 0 (0.0)                                                        | 8 (6.5)                               |
| West Pacific                                  | 27 (13.9)          | 4 (8.3)                                       | 0 (0.0)                                                        | 23 (18.5)                             |
| <b>World Bank Income Classification Level</b> |                    |                                               |                                                                |                                       |
| HIC                                           | 56 (28.9)          | 25 (52.1)                                     | 9 (40.9)                                                       | 22 (17.7)                             |
| UMIC                                          | 61 (31.4)          | 10 (20.8)                                     | 11 (50.0)                                                      | 40 (32.2)                             |
| LMIC                                          | 44 (22.7)          | 7 (14.6)                                      | 2 (9.1)                                                        | 35 (28.5)                             |
| LIC                                           | 33 (17.0)          | 6 (12.5)                                      | 0 (0.0)                                                        | 27 (21.8)                             |

HIC=High Income Countries, UMIC=Upper-Middle-Income Countries, LMIC=Lower-Middle-Income Countries, LIC=Low Income Countries.

**Supplemental material 2:** Complete list of search terms and associated variations found in NHPSPs, stratified by language English, French, and Spanish.

| ENGLISH                                                       |                                                         | FRENCH                                                                                                                             |                                                                                                                  | SPANISH                                                         |                                                                |
|---------------------------------------------------------------|---------------------------------------------------------|------------------------------------------------------------------------------------------------------------------------------------|------------------------------------------------------------------------------------------------------------------|-----------------------------------------------------------------|----------------------------------------------------------------|
| Search Terms                                                  | Variations found                                        | Search Terms                                                                                                                       | Variations found                                                                                                 | Search Terms                                                    | Variations found                                               |
| <b>Surgery-specific</b>                                       |                                                         |                                                                                                                                    |                                                                                                                  |                                                                 |                                                                |
| surg*                                                         | surgery, surgeries, surgical, neurosurgery, and surgeon | chirurgi*                                                                                                                          | chirurgie, chirurgien, chirurgicale, chirurgicaux, chirurgiens, neurochirurgien, médicochirurgicaux, chirurgical | cirug* / ciruj* / quirurgic*                                    | cirugía, cirujano, cirujanos, quirúrgico                       |
| injury<br>trauma                                              |                                                         | blesure*<br>traumat*                                                                                                               | blesure, blessures<br>traumatismes, traumatique, traumatology                                                    | lesion*<br>trauma*                                              | lesión, lesiones<br>trauma, traumatismo                        |
| operation<br>operative<br>operating<br>open fracture fixation |                                                         | operation / intervention<br>opératoire<br>opératoire / opérant<br>fixation de fracture ouverte / ostéosynthèse de fracture ouverte |                                                                                                                  | operacion*<br>operativo*<br>N/A<br>fijación de fractura abierta | operación, operaciones<br>operativo, operativos                |
| inguinal hernia<br>pediatric surgery                          |                                                         | hernie inguinale<br>chirurgie pédiatrique                                                                                          |                                                                                                                  | hernia inguinal<br>cirugía pediátrica                           |                                                                |
| <b>Children-specific</b>                                      |                                                         |                                                                                                                                    |                                                                                                                  |                                                                 |                                                                |
| child*                                                        | child, children, childbearing, childbirth, childhood    | enfant* / naissance                                                                                                                | enfant, enfants, enfance,                                                                                        | niñ*                                                            | niño, niños, niña, niñas, niñez                                |
| immuniz*                                                      | immunization, immunized                                 | immunis* / vaccin*                                                                                                                 | Immunisation, vacciné                                                                                            | vacuna* inmuniz*                                                | vacuna, vacunación, vacunaciones, inmunización, inmunizaciones |
| infant<br>malnutrition<br>stunt*                              | stunting                                                | bébé / infant*<br>malnutrition<br>retard de croissance                                                                             | infantile                                                                                                        | infant*<br>desnutrición<br>retraso en el crecimiento            | infante, infantes, infantil                                    |
| pedia*                                                        | pediatric, pediatrics                                   | pédiatr*                                                                                                                           | pédiatrique, pédiatriques, pédiatres, pédiatrie,                                                                 | pedia*                                                          | pediátrico, pediatría, pediátrica, pediatras,                  |
| wasting<br>circumcision                                       |                                                         | dépérissement<br>circoncision / posthectomy                                                                                        |                                                                                                                  | anemia<br>circuncisión                                          |                                                                |

**Supplemental material 3:** Search Terms in English, French, and Spanish with number of citations stratified by WHO regions and World Bank income classification level.

|                          | WHO Region   |             |             |             |              |             | World Bank Income Classification Level |               |               |              | TOTAL        |
|--------------------------|--------------|-------------|-------------|-------------|--------------|-------------|----------------------------------------|---------------|---------------|--------------|--------------|
|                          | AF<br>n (%)  | AM<br>n (%) | EM<br>n (%) | EU<br>n (%) | SEA<br>n (%) | WP<br>n (%) | HIC<br>n (%)                           | UMIC<br>n (%) | LMIC<br>n (%) | LIC<br>n (%) | n (%)        |
|                          | 2330 (100.0) | 325 (100.0) | 175 (100.0) | 224 (100.0) | 209 (100.0)  | 520 (100.0) | 286 (100.0)                            | 838 (100.0)   | 1065 (100.0)  | 1594 (100.0) | 3783 (100.0) |
| <b>Surgery-specific</b>  |              |             |             |             |              |             |                                        |               |               |              |              |
| Surg*                    | 169 (7.3)    | 17 (5.2)    | 21 (12.0)   | 4 (1.8)     | 23 (11.0)    | 35 (6.7)    | 11 (3.8)                               | 80 (9.5)      | 58 (5.4)      | 120 (7.5)    | 269 (7.1)    |
| Injury                   | 123 (5.3)    | 11 (3.4)    | 3 (1.7)     | 1 (0.4)     | 10 (4.8)     | 7 (1.3)     | 20 (7.0)                               | 23 (2.7)      | 48 (4.5)      | 64 (4.0)     | 155 (4.1)    |
| Trauma                   | 73 (3.1)     | 15 (4.6)    | 1 (0.6)     | 3 (1.3)     | 6 (2.9)      | 4 (0.8)     | 5 (1.7)                                | 27 (3.2)      | 40 (3.8)      | 30 (1.9)     | 102 (2.7)    |
| Operation                | 7 (0.3)      | 4 (1.2)     | 1 (0.6)     | 1 (0.4)     | 0 (0.0)      | 62 (11.9)   | 1 (0.3)                                | 39 (4.7)      | 32 (3.0)      | 3 (0.2)      | 75 (2.0)     |
| Operative                | 26 (1.1)     | 0 (0.0)     | 0 (0.0)     | 0 (0.0)     | 0 (0.0)      | 6 (1.2)     | 4 (1.4)                                | 6 (0.7)       | 13 (1.2)      | 9 (0.6)      | 32 (0.8)     |
| Operating                | 7 (0.3)      | 0 (0.0)     | 0 (0.0)     | 1 (0.4)     | 0 (0.0)      | 20 (3.8)    | 5 (1.7)                                | 12 (1.4)      | 5 (0.5)       | 6 (0.4)      | 28 (0.7)     |
| Open Frac. Fix.          | 0 (0.0)      | 0 (0.0)     | 0 (0.0)     | 0 (0.0)     | 1 (0.5)      | 2 (0.4)     | 0 (0.0)                                | 2 (0.2)       | 0 (0.0)       | 1 (0.1)      | 3 (0.1)      |
| Inguinal Hernia          | 0 (0.0)      | 0 (0.0)     | 0 (0.0)     | 0 (0.0)     | 0 (0.0)      | 0 (0.0)     | 0 (0.0)                                | 0 (0.0)       | 0 (0.0)       | 0 (0.0)      | 0 (0.0)      |
| 'Pediatric Surgery'      | 3 (0.1)      | 1 (0.3)     | 0 (0.0)     | 1 (0.4)     | 0 (0.0)      | 4 (0.8)     | 1 (0.3)                                | 2 (0.2)       | 3 (0.3)       | 3 (0.2)      | 9 (0.2)      |
| <b>Children-specific</b> |              |             |             |             |              |             |                                        |               |               |              |              |
| Child*                   | 1396 (59.9)  | 170 (52.3)  | 88 (50.3)   | 143 (63.8)  | 101 (48.3)   | 244 (46.9)  | 145 (50.7)                             | 426 (50.8)    | 620 (58.2)    | 951 (59.7)   | 2142 (56.6)  |
| Immuniz*                 | 131 (5.6)    | 27 (8.3)    | 14 (8.0)    | 31 (13.8)   | 29 (13.9)    | 48 (9.2)    | 30 (10.5)                              | 57 (6.8)      | 88 (8.3)      | 105 (6.6)    | 280 (7.4)    |
| Infant                   | 127 (5.5)    | 36 (11.1)   | 23 (13.1)   | 28 (12.5)   | 20 (9.6)     | 51 (9.8)    | 41 (14.3)                              | 89 (10.6)     | 70 (6.6)      | 85 (5.3)     | 285 (7.5)    |
| Malnutrition             | 173 (7.4)    | 20 (6.2)    | 16 (9.1)    | 8 (3.6)     | 9 (4.3)      | 16 (3.1)    | 7 (2.4)                                | 35 (4.2)      | 49 (4.6)      | 151 (9.5)    | 242 (6.4)    |
| Stunt*                   | 48 (2.1)     | 2 (0.6)     | 4 (2.3)     | 0 (0.0)     | 5 (2.4)      | 8 (1.5)     | 5 (1.7)                                | 6 (0.7)       | 26 (2.4)      | 30 (1.9)     | 67 (1.8)     |
| Pedia*                   | 16 (0.7)     | 11 (3.4)    | 2 (1.1)     | 2 (0.9)     | 2 (1.0)      | 11 (2.1)    | 7 (2.4)                                | 17 (2.0)      | 7 (0.7)       | 13 (0.8)     | 44 (1.2)     |
| Wasting                  | 15 (0.6)     | 11 (3.4)    | 2 (1.1)     | 1 (0.4)     | 3 (1.4)      | 1 (0.2)     | 4 (1.4)                                | 10 (1.2)      | 4 (0.4)       | 15 (0.9)     | 33 (0.9)     |
| Circumcision             | 16 (0.7)     | 0 (0.0)     | 0 (0.0)     | 0 (0.0)     | 0 (0.0)      | 1 (0.2)     | 0(0.0)                                 | 7 (0.8)       | 2 (0.2)       | 8 (0.5)      | 17 (0.4)     |

AF=African region, AM=American region, EM= Eastern Mediterranean region, EU=European region, SEA=South East Asia region, WP=West Pacific region.  
HIC=High Income Countries, UMIC=Upper-Middle-Income Countries, LMIC=Lower-Middle-Income Countries, LIC=Low Income Countries.  
For simplicity, only the English terms are used to describe the aggregated statistics of English, Spanish, and French search terms.  
<sup>a</sup> *surg\** includes surgery, surgeries, surgical, neurosurgery, and surgeon. <sup>b</sup> *child\** includes child, children, childbearing, childbirth, and childhood. <sup>c</sup> *immuniz\** includes immunization, and immunized. <sup>d</sup> *stunt\** includes stunting. <sup>e</sup> *pedia\** includes pediatric and pediatrics.

# BMJ Open

## A Global and Regional Overview of the Inclusion of Pediatric Surgery in the National Health Plans of 124 countries: An Ecological Study

|                                 |                                                                                                                                                                                                                                                                                                                                                                                                                                                                                                                                                                                                                                                                                                                                                                                                                                                                                                                                                                                                                                                                                                                                                                                                  |
|---------------------------------|--------------------------------------------------------------------------------------------------------------------------------------------------------------------------------------------------------------------------------------------------------------------------------------------------------------------------------------------------------------------------------------------------------------------------------------------------------------------------------------------------------------------------------------------------------------------------------------------------------------------------------------------------------------------------------------------------------------------------------------------------------------------------------------------------------------------------------------------------------------------------------------------------------------------------------------------------------------------------------------------------------------------------------------------------------------------------------------------------------------------------------------------------------------------------------------------------|
| Journal:                        | <i>BMJ Open</i>                                                                                                                                                                                                                                                                                                                                                                                                                                                                                                                                                                                                                                                                                                                                                                                                                                                                                                                                                                                                                                                                                                                                                                                  |
| Manuscript ID                   | bmjopen-2020-045981.R1                                                                                                                                                                                                                                                                                                                                                                                                                                                                                                                                                                                                                                                                                                                                                                                                                                                                                                                                                                                                                                                                                                                                                                           |
| Article Type:                   | Original research                                                                                                                                                                                                                                                                                                                                                                                                                                                                                                                                                                                                                                                                                                                                                                                                                                                                                                                                                                                                                                                                                                                                                                                |
| Date Submitted by the Author:   | 21-Mar-2021                                                                                                                                                                                                                                                                                                                                                                                                                                                                                                                                                                                                                                                                                                                                                                                                                                                                                                                                                                                                                                                                                                                                                                                      |
| Complete List of Authors:       | Landrum, Kelsey; Duke University, Global Health Institute Cotache-Condor, Cesia; Baylor University, Department of Public Health<br>Liu, Yingling; Baylor University, Department of Sociology<br>Truche, Paul; Harvard Medical School, Program in Global Surgery and Social Change<br>Robinson, Julia; Baylor University, Department of Public Health<br>Thompson, Nealey; Baylor University, Department of Public Health<br>Granzin, Ryann; Baylor University, Department of Public Health<br>Ameh, Emmanuel; National Hospital, Abuja, ; National Hospital, Abuja, Nigeria, Division of Paediatric Surgery<br>Bickler, Steve; Rady Children's Hospital San Diego, Division of Pediatric Surgery; University of California San Diego, Department of Surgery<br>Samad, Lubna; Indus Hospital, Department of Pediatric Surgery<br>Meara, John; Boston Children's Hospital, Plastic and Oral Surgery; Harvard Medical School, Program in Global Surgery and Social Change<br>Rice, Henry; Duke University, Global Health Institute; Duke University Medical Center, Department of Surgery<br>Smith, Emily; Baylor University, Department of Public Health; Duke University, Global Health Institute |
| <b>Primary Subject Heading</b>: | Surgery                                                                                                                                                                                                                                                                                                                                                                                                                                                                                                                                                                                                                                                                                                                                                                                                                                                                                                                                                                                                                                                                                                                                                                                          |
| Secondary Subject Heading:      | Health policy, Paediatrics, Global health                                                                                                                                                                                                                                                                                                                                                                                                                                                                                                                                                                                                                                                                                                                                                                                                                                                                                                                                                                                                                                                                                                                                                        |
| Keywords:                       | Health policy < HEALTH SERVICES ADMINISTRATION & MANAGEMENT, PAEDIATRICS, SURGERY                                                                                                                                                                                                                                                                                                                                                                                                                                                                                                                                                                                                                                                                                                                                                                                                                                                                                                                                                                                                                                                                                                                |
|                                 |                                                                                                                                                                                                                                                                                                                                                                                                                                                                                                                                                                                                                                                                                                                                                                                                                                                                                                                                                                                                                                                                                                                                                                                                  |

SCHOLARONE™  
Manuscripts

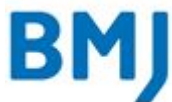

I, the Submitting Author has the right to grant and does grant on behalf of all authors of the Work (as defined in the below author licence), an exclusive licence and/or a non-exclusive licence for contributions from authors who are: i) UK Crown employees; ii) where BMJ has agreed a CC-BY licence shall apply, and/or iii) in accordance with the terms applicable for US Federal Government officers or employees acting as part of their official duties; on a worldwide, perpetual, irrevocable, royalty-free basis to BMJ Publishing Group Ltd ("BMJ") its licensees and where the relevant Journal is co-owned by BMJ to the co-owners of the Journal, to publish the Work in this journal and any other BMJ products and to exploit all rights, as set out in our [licence](#).

The Submitting Author accepts and understands that any supply made under these terms is made by BMJ to the Submitting Author unless you are acting as an employee on behalf of your employer or a postgraduate student of an affiliated institution which is paying any applicable article publishing charge ("APC") for Open Access articles. Where the Submitting Author wishes to make the Work available on an Open Access basis (and intends to pay the relevant APC), the terms of reuse of such Open Access shall be governed by a Creative Commons licence – details of these licences and which [Creative Commons](#) licence will apply to this Work are set out in our licence referred to above.

Other than as permitted in any relevant BMJ Author's Self Archiving Policies, I confirm this Work has not been accepted for publication elsewhere, is not being considered for publication elsewhere and does not duplicate material already published. I confirm all authors consent to publication of this Work and authorise the granting of this licence.

1  
2  
3 **A Global and Regional Overview of the Inclusion of Pediatric Surgery in the National Health**  
4 **Plans of 124 countries: An Ecological Study**  
5  
6

7 Kelsey Landrum<sup>1</sup>, Cesia Cotache-Condor<sup>2</sup>, Yingling Liu<sup>3</sup>, Paul Truche<sup>4</sup>, Julia Robinson<sup>2</sup>, Nealey  
8 Thompson<sup>2</sup>, Ryann Granzin<sup>2</sup>, Emmanuel A. Ameh<sup>5</sup>, Steve W. Bickler<sup>6</sup>, Lubna Samad<sup>7</sup>, John  
9 Meara<sup>4,8</sup>, Henry E Rice<sup>1</sup>, Emily R Smith<sup>1,2</sup>, on behalf of the Global Initiative for Children's Surgery  
10  
11  
12  
13

14  
15 <sup>1</sup> Duke Global Health Institute, Duke University, Durham, NC, USA; <sup>2</sup> Department of Public Health,  
16 Robbins College of Health and Human Sciences, Baylor University, Waco, TX, USA; <sup>3</sup> Department of  
17 Sociology, College of Arts and Sciences, Baylor University, Waco, TX, USA; <sup>4</sup> Program in Global  
18 Surgery and Social Change, Harvard Medical School, Boston, USA; <sup>5</sup> Division of Pediatric Surgery,  
19 Department of Surgery, National Hospital, Abuja, Nigeria; <sup>6</sup> Division of Pediatric Surgery, Rady  
20 Children's Hospital San Diego, Department of Surgery, University of California San Diego, San Diego,  
21 CA; <sup>7</sup> Department of Pediatric Surgery, Center for Essential Surgical and Acute Care, Global Health  
22 Directorate, Indus Health Network, Karachi, Pakistan, The Indus Hospital, Karachi, Pakistan; <sup>8</sup> Boston  
23 Children's Hospital, Boston, MA, USA.  
24  
25  
26  
27  
28  
29  
30  
31  
32

33 Kelsey Landrum and Cesia Cotache-Condor contributed equally to this paper.  
34  
35  
36  
37

38 **Word Count:** 2,705  
39  
40  
41  
42

43 **Corresponding author:**  
44

45 Emily R Smith, PhD.  
46

47 Robbins College of Health and Human Sciences, Baylor University  
48

49 1621 S. 5th Street  
50

51 Waco, TX 76706  
52

53 Emily\_R\_Smith@baylor.edu | +1-254-710-4028  
54  
55  
56  
57  
58  
59  
60

## ABSTRACT

**Objectives:** This study evaluates the priority given to surgical care for children within National Health Policies, Strategies, and Plans (NHPSPs).

**Participants and setting:** We reviewed the NHPSPs available in the World Health Organization's (WHO) Country Planning Cycle Database. Countries with NHPSPs in languages different from English, Spanish, French, or Chinese were excluded. A total of 124 countries met the inclusion criteria.

**Primary and secondary outcome measures:** We searched for child-specific and surgery-specific terms in the NHPSPs' missions, goals, and strategies using three analytic approaches: 1) count of the total number of mentions, 2) count of the number of policies with no mentions, and 3) count of the number of policies with five or more mentions. Outcomes were compared across WHO regional and World Bank income-level classifications.

**Results:** We found that the most frequently mentioned terms were "child\*", "infant\*", and "immuniz\*". The most frequently mentioned surgery term was "surg\*". Overall, 45% of NHPSPs discussed surgery, and 7% discussed children's surgery. The majority (93%) of countries did not mention selected essential and cost-effective children's procedures. When stratified by WHO region and World Bank income level, the West Pacific region led the inclusion of "pediatric surgery" in national health plans with 17% of its countries mentioning this term. Likewise, LICs led the inclusion of surg\* and "pediatric surgery" with 63% and 11% of countries mentioning these terms, respectively. In both stratifications, pediatric surgery only equated to less than 1% of the total terms.

**Conclusion:** The low prevalence of children's surgical search terms in NHPSPs indicates that the influence of surgical care for this population remains low in the majority of countries. Increased awareness of children's surgical needs in national health plans might constitute a critical step to scale up surgical system in these countries.

**Keywords:** Pediatric Surgery, NSOAP, Health Policy, Universal Health Coverage

### Strengths and limitations of the study

- This study uses national health plans as strong indicators to evaluate the priority given to pediatric surgical care in 124 countries.
- This study used a comprehensive set of proxy indicators to evaluate pediatric surgical care's impact on the national health plans.
- Underrepresentation of high-income countries was a limitation.
- Underrepresentation of countries whose health plans were written in languages different from English, Spanish, French, or Chinese was a limitation.



## INTRODUCTION

Worldwide an estimated 1.7 billion children and adolescents, predominantly from low- and middle-income countries (LMICs) lack access to safe, affordable, and timely surgical and anesthesia care [1]. Although surgery has gained increased awareness in the global health agenda in recent years [2-4], surgery for children has received less attention. The burden of surgical disease among children in LMICs is high, with 15-20% of children in LMICs having surgically amenable conditions [5-11]. In addition, the consequences of untreated surgical conditions for children include life-long disabilities and social stigmatization [5 9 12-25]. National investments in surgical care for children are needed to improve children's health across all regions and income levels [6 7 19 21 26].

National Health Policies, Strategies, and Plans (NHPSPs) are country-level frameworks to design and operate complex health systems and are critical to aligning national strategies, policies, and goals for population health [27]. NHPSPs bring together stakeholders from across national and sub-national levels to develop a health system in line with national political, socio-economic, and historical complexities. NHPSPs are developed through cooperation with the World Health Organization (WHO) and facilitate the definition and support of national priorities [28]. In addition, NHPSPs are key elements for governmental negotiations regarding fiscal space and budget execution [29]. Therefore, these documents are excellent proxies to evaluate health priorities at a national level.

Designing country-level plans within an NHPSP framework is recommended to each WHO Member State[30]. Of the 194 Member States, 155 countries have updated an NHPSP in the last 5 years [27]. NHPSPs are strong measures of each country's priority to specific health conditions and can help assess if surgical care is incorporated into national plans. A number of countries have recognized a lack of policy-level strategy for improving surgical care. Eight countries have developed specific National Surgical, Obstetric, and Anesthesia Plans (NSOAPs) to address the gap in national strategic planning for improved access to surgical care [31-33]. Our study expands our understanding of the prioritization of children's surgical care in national health policy and strategies. As such, this study aimed to evaluate the level of priority given to surgical care for children within NHPSPs and provide recommendations on aligning these plans with the use of NSOAPs in LMICs.

## METHODS

### Search strategy and data collection

In the context of this manuscript, priority given to pediatric surgical care at a national level was defined as the inclusion of surgery-specific terms for children in the countries' NHPSPs. Inclusion criteria included publication in English, Spanish, French, or Chinese as these are part of the six WHO's official languages [34]. NHPSPs written in Russian and Arabic were not included due to a lack of resources to address these languages. From September to October 2019, five investigators searched NHPSPs available in the WHO's Country Planning Cycle Database [35]. The investigators assessed each country's NHPSPs mission, vision, goals, or strategies using 17 search terms related to child health and surgery-specific issues (Table 1). The selected terms were translated into Spanish by one of the coauthors, who is a native speaker. The terms in French were translated by the investigators and were validated by a native speaker health professional with expertise in global surgery (LMK) outside of the group of coauthors. The variations of the terms included for Spanish and French not always had an exact equivalent in English. In addition to variations in language, different variations of the terms were considered during the search. **Supplemental material 1** includes a complete list of terms in the three languages assessed in this study.

Each NHPSP PDF file was searched using the search function for each term and subsequently counted by frequency. The investigators carefully read the context in which the term appeared and only counted the relevant terms to this study. We selected the search terms based on a review of existing surgical and child health literature and international and national health policy reports. Specifically, search terms were chosen as common terms used in the current global surgery literature [2 7 12]. The search terms were grouped into child-specific and surgery-specific to evaluate pediatric surgery priority compared to other well-known priorities in child health and general surgery. We included the terms "circumcision", "open fracture fixation", and "inguinal hernia," as these are the three most commonly performed and cost-effective children's surgical procedures [21]. We followed three different analytic approaches for each search term. First, we counted the total number of mentions of each search term. Second, we counted the number of policies that have no mention of any search term. Third, we counted the number of policies with 5 or more mentions for each search term. The indicator of at least five mentions was established as a significant number following previous literature that evaluates the inclusion of surgery in African countries' health plans [36]. All data were stored in Microsoft Excel.

### Data analysis

The NHPSPs were stratified according to the WHO regional divisions in the African region (AF), region of the Americas (AM), Eastern Mediterranean region (EM), South-East Asia region (SEA), European region (EU), and Western Pacific region (WP) to analyze geographic patterns countries. Likewise, the NHPSPs were stratified according to the World Bank's Fiscal Year 2019 income classification [37]. Descriptive and inference statistics were performed to analyze patterns of inclusion of search terms in NHPSPs across WHO regions and World Bank income levels. We used the analysis of variance (ANOVA) test and Tukey's Studentized Range test to compare the means of search terms across the mentioned categories. All analyses were performed using SAS (version 9.4; SAS Institute Inc).

### Patient and Public Involvement

It was not appropriate or possible to involve patients or the public in the design, or conduct, or reporting, or dissemination plans of our research.

**Ethical approval:** This study does not involve human participants. Therefore, research approval was not applicable.

## RESULTS

From 194 WHO Member States, 146 countries had NHPSPs available in the WHO's Country Planning Cycle Database. From the 146 NHPSPs assessed for eligibility, 22 NHPSPs were excluded because of being written in languages different from English, French, Spanish, and Chinese. The vast majority of these NHPSPs were written in languages not included as part of the six WHO's official languages. No NHPSP was written in Chinese. In total, 124 NHPSPs were included in this review (**Figure 1, Supplemental material 2**).

**Table 1.** Search terms in English, French, and Spanish with frequency of mentions and proportions of policies with no mentions, at least one mention and more than five mentions.

| Search Terms English     | Search Terms French                                              | Search Terms Spanish         | Total Mentions<br>n (%)<br>3783 (100) | Number of policies with <b>no</b> mentions of term<br>n (%)<br>124 (100) | Number of policies with <b>at least 1</b> mention of term<br>n (%)<br>124 (100) | Number of policies with <b>5 or more</b> mentions of term<br>n (%)<br>124 (100) |
|--------------------------|------------------------------------------------------------------|------------------------------|---------------------------------------|--------------------------------------------------------------------------|---------------------------------------------------------------------------------|---------------------------------------------------------------------------------|
| <b>Surgery-specific</b>  |                                                                  |                              |                                       |                                                                          |                                                                                 |                                                                                 |
| <i>surg</i> <sup>a</sup> | chirurgi*                                                        | cirug* / ciruj* / quirurgic* | 269 (7.1)                             | 68 (54.8)                                                                | 56 (45.2)                                                                       | 14 (11.3)                                                                       |
| injury                   | blessure*                                                        | lesion*                      | 155 (4.1)                             | 80 (64.5)                                                                | 44 (35.5)                                                                       | 9 (7.3)                                                                         |
| trauma                   | traumat*                                                         | trauma*                      | 102 (2.7)                             | 88 (71.0)                                                                | 36 (29.0)                                                                       | 6 (5.8)                                                                         |
| operation                | operation / intervention                                         | operacion*                   | 75 (2.0)                              | 90 (72.6)                                                                | 18 (14.5)                                                                       | 5 (4.8)                                                                         |
| operative                | opérateur                                                        | operativo*                   | 32 (0.8)                              | 109 (87.9)                                                               | 14 (11.3)                                                                       | 3 (2.4)                                                                         |
| operating                | opérateur / opérant                                              | N/A                          | 28 (0.7)                              | 80 (64.5)                                                                | 12 (9.7)                                                                        | 2 (1.6)                                                                         |
| open fracture fixation   | fixation de fracture ouverte / ostéosynthèse de fracture ouverte | fijación de fractura abierta | 3 (0.1)                               | 121 (97.6)                                                               | 3 (2.4)                                                                         | 0 (0.0)                                                                         |
| inguinal hernia          | hernie inguinale                                                 | hernia inguinal              | 0 (0.0)                               | 124 (100.0)                                                              | 0 (0.0)                                                                         | 0 (0.0)                                                                         |
| pediatric surgery        | chirurgie pédiatrique                                            | cirujía pediátrica           | 9 (0.2) <sup>f</sup>                  | 115 (92.7)                                                               | 9 (7.3)                                                                         | 0 (0.0)                                                                         |
| <b>Children-specific</b> |                                                                  |                              |                                       |                                                                          |                                                                                 |                                                                                 |
| child <sup>*b</sup>      | enfant* / naissance                                              | niñ*                         | 2142 (56.6)                           | 16 (12.9)                                                                | 108 (87.1)                                                                      | 85 (68.5)                                                                       |
| immuniz <sup>*c</sup>    | immunis* / vaccin*                                               | vacuna* inmuniz*             | 280 (7.4)                             | 50 (40.3)                                                                | 74 (59.7)                                                                       | 19 (15.3)                                                                       |
| infant                   | bébé / infant*                                                   | infant*                      | 285 (7.5)                             | 48 (38.7)                                                                | 76 (61.3)                                                                       | 21 (16.9)                                                                       |
| malnutrition             | malnutrition                                                     | desnutricion                 | 242 (6.4)                             | 67 (54.0)                                                                | 57 (46.0)                                                                       | 17 (13.7)                                                                       |
| stunt <sup>*d</sup>      | retard de croissance                                             | retraso en el crecimiento    | 67 (1.8)                              | 89 (71.8)                                                                | 35 (28.2)                                                                       | 4 (3.2)                                                                         |
| pedia <sup>*e</sup>      | pédiatr*                                                         | pedia*                       | 44 (1.2)                              | 101 (81.5)                                                               | 23 (18.5)                                                                       | 1 (0.8)                                                                         |
| wasting                  | dépérissement                                                    | anemia                       | 33 (0.9)                              | 106 (85.5)                                                               | 18 (14.5)                                                                       | 1 (0.8)                                                                         |
| circumcision             | circoncision / posthectomie                                      | Circuncisión                 | 17 (0.4)                              | 115 (92.7)                                                               | 9 (7.3)                                                                         | 0 (0.0)                                                                         |

For simplicity in the remaining text of this paper only English terms will be used to describe the statistics revealed by both English and French and Spanish search terms.

<sup>a</sup> *surg*\* includes surgery, surgeries, surgical, neurosurgery, and surgeon. <sup>b</sup> *child*\* includes child, children, childbearing, childbirth, and childhood. <sup>c</sup> *immuniz*\* includes immunization, and immunized. <sup>d</sup> *stunt*\* includes stunting. <sup>e</sup> *pedia*\* includes pediatric and pediatrics. <sup>f</sup> Mentions of "pediatric surgery" were found in NHPSPs from Uganda, Democratic Republic of Congo, Congo, Chile, Tajikistan, Cambodia, China, Cook Islands, and Vietnam.

**Table 2.** Comparison of means (ANOVA) of frequency of search terms across WHO regions and World Bank income level. Statistically significant different means were bolded (Tukey's Studentized Range).

| Search terms             | WHO REGION          |                       |                        |                     |                      |                        |        | WORLD BANK INCOME LEVEL |                   |                   |                   |        |  |
|--------------------------|---------------------|-----------------------|------------------------|---------------------|----------------------|------------------------|--------|-------------------------|-------------------|-------------------|-------------------|--------|--|
|                          | Africa<br>Mean (SE) | Americas<br>Mean (SE) | E Mediter<br>Mean (SE) | Europe<br>Mean (SE) | SE Asia<br>Mean (SE) | W Pacific<br>Mean (SE) | P      | HIC<br>Mean (SE)        | UMIC<br>Mean (SE) | LMIC<br>Mean (SE) | LIC<br>Mean (SE)  | P      |  |
| <b>Surgery-specific</b>  |                     |                       |                        |                     |                      |                        |        |                         |                   |                   |                   |        |  |
| surg*                    | <b>4.4</b> (1.3)    | <b>0.7</b> (0.3)      | 1.8 (1.1)              | <b>0.2</b> (0.2)    | 2.9 (1.5)            | 1.5 (0.6)              | 0.0198 | <b>0.5</b> (0.2)        | 2.0 (0.6)         | 1.7 (0.7)         | <b>4.6</b> (1.7)  | 0.0276 |  |
| injury                   | <b>3.2</b> (0.8)    | <b>0.5</b> (0.2)      | <b>0.3</b> (0.1)       | <b>0.1</b> (0.1)    | 1.3 (1.0)            | <b>0.3</b> (0.2)       | 0.0002 | 0.9 (0.7)               | 0.6 (0.1)         | 1.4 (0.5)         | 2.5 (0.9)         | 0.1057 |  |
| trauma                   | <b>1.9</b> (0.5)    | 0.6 (0.2)             | <b>0.1</b> (0.1)       | <b>0.2</b> (0.1)    | 0.8 (0.5)            | <b>0.2</b> (0.1)       | 0.0009 | 0.2 (0.1)               | 0.7 (0.2)         | 1.1 (0.5)         | 1.2 (0.3)         | 0.23   |  |
| operation                | <b>0.2</b> (0.1)    | <b>0.2</b> (0.1)      | <b>0.1</b> (0.1)       | <b>0.1</b> (0.1)    | <b>0.0</b> (0.0)     | <b>2.7</b> (1.0)       | <.0001 | 0.0 (0.0)               | 1.0 (0.4)         | 0.9 (0.6)         | 0.1 (0.1)         | 0.2197 |  |
| operative                | 0.7 (0.2)           | 0.0 (0.0)             | 0.0 (0.0)              | 0.0 (0.0)           | 0.0 (0.0)            | 0.3 (0.2)              | 0.026  | 0.2 (0.2)               | 0.2 (0.1)         | 0.4 (0.2)         | 0.3 (0.2)         | 0.7019 |  |
| operating                | <b>0.2</b> (0.1)    | <b>0.0</b> (0.0)      | <b>0.0</b> (0.0)       | <b>0.1</b> (0.1)    | <b>0.0</b> (0.0)     | <b>1.1</b> (0.3)       | <.0001 | 0.3 (0.2)               | 0.4 (0.2)         | 0.2 (0.1)         | 0.2 (0.2)         | 0.8311 |  |
| open fracture fixation   | 0.0 (0.0)           | 0.0 (0.0)             | 0.0 (0.0)              | 0.0 (0.0)           | 0.1 (0.1)            | 0.1 (0.1)              | 0.0869 | 0.0 (0.0)               | 0.1 (0.0)         | 0.0 (0.0)         | 0.0 (0.0)         | 0.433  |  |
| inguinal hernia          | 0.0 (0.0)           | 0.0 (0.0)             | 0.0 (0.0)              | 0.0 (0.0)           | 0.0 (0.0)            | 0.0 (0.0)              | n/a    | 0.0 (0.0)               | 0.0 (0.0)         | 0.0 (0.0)         | 0.0 (0.0)         | n/a    |  |
| pediatric surgery        | 0.1 (0.0)           | 0.0 (0.0)             | 0.0 (0.0)              | 0.1 (0.1)           | 0.0 (0.0)            | 0.2 (0.1)              | 0.3611 | 0.0 (0.0)               | 0.1 (0.0)         | 0.1 (0.0)         | 0.1 (0.1)         | 0.7154 |  |
| <b>Children-specific</b> |                     |                       |                        |                     |                      |                        |        |                         |                   |                   |                   |        |  |
| child*                   | <b>36.7</b> (5.0)   | <b>7.1</b> (1.6)      | <b>7.3</b> (2.0)       | <b>7.9</b> (2.7)    | <b>12.6</b> (3.1)    | <b>10.6</b> (2.4)      | <.0001 | <b>6.7</b> (1.2)        | <b>10.7</b> (2.5) | <b>17.7</b> (3.5) | <b>36.6</b> (6.2) | <.0001 |  |
| immuniz*                 | 3.4 (0.8)           | 1.1 (0.2)             | 1.2 (0.3)              | 1.6 (0.8)           | 3.6 (1.6)            | 2.1 (0.7)              | 0.0984 | <b>1.3</b> (0.4)        | <b>1.4</b> (0.4)  | 2.5 (0.6)         | <b>4.0</b> (1.1)  | 0.0164 |  |
| infant                   | 3.3 (0.8)           | 1.5 (0.4)             | 1.9 (0.8)              | 1.5 (0.6)           | 2.5 (1.5)            | 2.2 (0.4)              | 0.2736 | 1.8 (0.5)               | 2.2 (0.6)         | 2.0 (0.5)         | 3.3 (0.7)         | 0.394  |  |
| malnutrition             | <b>4.6</b> (0.9)    | <b>0.8</b> (0.3)      | <b>1.3</b> (0.5)       | <b>0.4</b> (0.3)    | 1.1 (0.5)            | <b>0.7</b> (0.3)       | <.0001 | <b>0.3</b> (0.3)        | <b>0.9</b> (0.2)  | <b>1.4</b> (0.3)  | <b>5.8</b> (1.2)  | <.0001 |  |
| stunt*                   | <b>1.3</b> (0.3)    | <b>0.1</b> (0.1)      | 0.3 (0.1)              | <b>0.0</b> (0.0)    | 0.6 (0.3)            | <b>0.3</b> (0.1)       | 0.0002 | <b>0.2</b> (0.1)        | <b>0.2</b> (0.1)  | 0.7 (0.2)         | <b>1.2</b> (0.4)  | 0.0026 |  |
| pedia*                   | 0.4 (0.2)           | 0.5 (0.2)             | 0.2 (0.2)              | 0.1 (0.1)           | 0.3 (0.3)            | 0.5 (0.3)              | 0.76   | 0.3 (0.2)               | 0.5 (0.2)         | 0.2 (0.1)         | 0.5 (0.2)         | 0.648  |  |
| wasting                  | 0.4 (0.2)           | 0.5 (0.2)             | 0.2 (0.1)              | 0.1 (0.1)           | 0.4 (0.2)            | 0.0 (0.0)              | 0.3519 | 0.2 (0.1)               | 0.3 (0.1)         | 0.1 (0.1)         | 0.6 (0.3)         | 0.1525 |  |
| circumcision             | 0.4 (0.2)           | 0.0 (0.0)             | 0.0 (0.0)              | 0.0 (0.0)           | 0.0 (0.0)            | 0.0 (0.0)              | 0.0219 | 0.0 (0.0)               | 0.2 (0.1)         | 0.1 (0.0)         | 0.3 (0.2)         | 0.2382 |  |

For simplicity in the remaining text of this paper only English terms will be used to describe the statistics revealed by both English and French and Spanish search terms.

<sup>a</sup> *surg\** includes surgery, surgeries, surgical, neurosurgery, and surgeon. <sup>b</sup> *child\** includes child, children, childbearing, childbirth, and childhood. <sup>c</sup> *immuniz\** includes immunization, and immunized. <sup>d</sup> *stunt\** includes stunting. <sup>e</sup> *pedia\** includes pediatric and pediatrics.

1  
2  
3  
4 The term with the most mentions was "child\*" with 2,142 mentions, followed by the terms "infant"  
5 and "immuniz\*" with 285 (8%) and 280 (7%) mentions, respectively (**Table 1**). The terms "surg\*"  
6 and "pediatric surgery" were mentioned at least once in 45% and 7% of NHPSPs, respectively. Sixty-  
7 eight (55%) NHPSPs did not mention "surg\*". Only 11% of NHPSPs mentioned "surg\*" more than  
8 five times and no NHPSP mentioned "pediatric surgery" more than five times. In comparison, over  
9 50% of NHPSPs mentioned other common child-specific issues such as "immuniz\*" (60% of  
10 NHPSPs), "infant" (39%), or "malnutrition" (54%). Nine countries, including Congo, Uganda,  
11 Democratic Republic of Congo, Chile, Tajikistan, Cambodia, China, Cook Islands, and Vietnam  
12 mentioned "pediatric surgery" in their NHPSPs. Terms mentioning essential and cost-effective  
13 children's procedures, including "circumcision" (7%), "open fracture fixation" (2%), and "inguinal  
14 hernia" (0%), were the least likely to be mentioned. When stratified by WHO region and World Bank  
15 income level, the average frequency of inclusion of surg\* (4.4 and 4.6) and child\* (36.7 and 36.6)  
16 was higher for Africa and LCIs, compared to the other regions and income groups (**Table 2**).  
17 Comparisons for "pediatric surgery" and the essential and cost-effective children's procedures were  
18 not statistically significant.  
19  
20  
21  
22  
23  
24  
25  
26  
27  
28

29 All (100%) countries from Africa, East Mediterranean, and South East Asia regions mentioned  
30 child\* at least once and over 60% of countries from South East Asia and African mentioned surg\*. In  
31 contrast, only 17% of countries from the West Pacific Region (the highest percentage among all  
32 regions) mentioned "pediatric surgery" (**Figure 2**). The Eastern Mediterranean region and the South  
33 East Asia region had no mentions of "pediatric surgery" in their NHPSPs. The cost-effective  
34 pediatric surgical procedures were only mentioned in the West Pacific, South East Asia, and Africa  
35 regions. The West Pacific region (44%) and the African region (33%) had the most frequent  
36 mentions of "pediatric surgery" and combined make up to 77% of mentions for this search term.  
37 However, when compared to other terms, "pediatric surgery" only equated to 0.8% and 0.1% of total  
38 search term mentions, respectively (**Supplemental material 3 & 4**).  
39  
40  
41  
42  
43  
44  
45

46 Over 80% of countries from each income level group mentioned child\* in their national health plans.  
47 LICs lead the inclusion of surg\* and "pediatric surgery" with 63% and 11% of countries mentioning  
48 these terms, respectively (**Figure 3**). The cost-effective pediatric surgical procedures were not  
49 mentioned by HICs and under 15% of countries from the other regions mentioned these terms. LICs  
50 had the highest frequency of mentions for "surg\*" (45%), which equates to 8% of the total mentions  
51 for this economic group. NHPSPs from LICs (33%) and LMICs (33%) concentrated the majority of  
52 mentions for "pediatric surgery" and combined make up to 66% of mentions for this term. However,  
53  
54  
55  
56  
57  
58  
59  
60

1  
2  
3 when compared to other terms, "pediatric surgery" only equates to 0.2% and 0.3% of total search  
4 term mentions, respectively (**Supplemental material 5**).

## 9 **DISCUSSION**

10  
11 Inclusion of children's surgical care coverage in NHPSPs and NSOAPs is improving the health of  
12 children and alignment of surgical care with UHC frameworks [38-40]. Our study provides evidence  
13 that the financing of surgical care for children and penetration of UHC policies for surgical coverage  
14 for children in NHPSPs is quite limited, with under 18% and 15% of countries addressing pediatric  
15 surgical care across income levels and regions. Furthermore, The majority (93%) of countries did not  
16 mention selected essential and cost-effective children's procedures. Given that children's surgical care  
17 requires a unique set of workforce and infrastructure, this gap in the inclusion of surgical needs for  
18 children is an opportunity to define children's surgical care as a part of national essential benefit  
19 packages.  
20

21  
22 Surgical care was more frequently discussed within NHPSPs in the Africa region in comparison to  
23 other regions. Fewer countries from the European region addressed surgical-specific and pediatric  
24 surgery terms. This finding could reflect the number of countries, particularly in the WHO Africa  
25 region, that have created NSOAPs [32]. More countries from the Western Pacific region mentioned  
26 "pediatric surgery," despite a lack of NSOAPs in that region. Furthermore, the Western Pacific  
27 region used language including "operation" more frequently than other regions, a finding that could  
28 indicate a lack of international consensus on NSOAP language. The Western Pacific region has had a  
29 long-standing collaborative partnership in surgical training and provision of specialist surgical  
30 services in the region with the Royal Australasian College of Surgeons. Over the first 15 years of the  
31 partnership, operations done by trainees increased from 10% to 77%, and nurse anesthetists were  
32 trained and deployed in each hospital [41]. In addition, collaborations between nations have recently  
33 resulted in 13 of the 14 countries collectively measuring the first four Lancet Commission global  
34 surgery indicators [42]. This type of collaborative partnerships could serve as key examples of  
35 integrating surgical care on national levels.  
36  
37

38  
39 When stratified by income level, LICs were most likely to mention surgery-specific search terms in  
40 addition to children-specific search terms compared to HICs, a finding consistent with the increasing  
41 number of LICs that are developing NSOAPs. Overall, however, the low frequency of children-  
42 specific surgical procedures could be reflective of a lack of global consensus on defining essential  
43  
44  
45  
46  
47  
48  
49

1  
2  
3 surgical procedures for children. This finding suggests an opportunity to define surgical procedures  
4 for children such that future NHPSPs and NSOAPs can target prevalent surgical conditions and cost-  
5 effective care to improve the health of children in national UHC goals. This has partially been done  
6 with the latest edition of the *Disease Control Priorities 3*, mainly for congenital conditions [38].  
7  
8

9  
10 Although surgical conditions are a high burden for children in many LMICs, a list of cost-effective,  
11 essential surgical procedures for children still needs to be defined for the inclusion of children's  
12 surgical care in NHPSPs and NSOAPs. Furthermore, because children's surgical care is  
13 subspecialized in nature, organized referral systems, specialized centers, and specialized workforce  
14 are required simultaneously for optimal outcomes. The Global Initiative for Children's Surgery  
15 (GICS), a collaborative organization with over 150 providers worldwide, developed guidelines in the  
16 Optimal Resources for Children's Surgery (OReCS) document to support the provision of care at  
17 every healthcare level based on infrastructure, service delivery, training, and research [21 26 43 44].  
18 The OReCS document outlines a multi-faceted strategy for integrating procedure-specific surgical  
19 care for children into NSOAPs. The OReCS document serves as a specific guide to scale-up surgical  
20 care in an organized manner by addressing all levels of healthcare in the country, including referral  
21 systems and workforce expansion. The utility of the OReCS document in conjunction with national  
22 child health policy plans, NHPSPs, and NSOAPs could serve as a starting point for integrating child-  
23 specific surgical care into existing or developing national health plans.  
24  
25

26  
27 Nigeria can serve as an example of successfully integrating the OReCS document with NSOAPs and  
28 NHPSPs through the lens of UHC (**Figure 4**). Nigeria's robust development of a national surgical  
29 plan is integrated into the national health plan and includes the provision and strengthening of  
30 children and adolescents' surgical care within the existing healthcare systems. This model highlights  
31 the utility of using national plans that can address multiple sectors of surgical delivery in a  
32 coordinated manner. Going forward, the success of Nigeria's integration of children's surgical care  
33 within national health plans can serve as a template for other countries to follow.  
34  
35

36  
37 Surgically amenable conditions will increasingly impact children around the world, as over a quarter  
38 of the global population is under fifteen years of age, and approximately 50% of the population in  
39 LICs are under the age of 15 [39 40]. Inclusion of children's surgical policies in NHPSPs and WHO  
40 regional health plans might constitute a critical step in the efforts to meet the United Nation's  
41 Strategic Development Goals (SDG)-3 goals of achieving 80% coverage of essential healthcare  
42 services while protecting 100% of patients from impoverishing and catastrophic health expenditures  
43 [45].  
44  
45  
46  
47  
48  
49  
50  
51  
52  
53  
54  
55  
56  
57  
58  
59  
60



## Limitations

Our study limitations include being unable to locate NHPSPs for all countries on the WHO Country Planning Cycle Database. Of the 48 countries not included, 73% were from HICs or UMICs, which may have biased the results as HICs and UMICs were less likely to report surgical-specific and child-specific search terms than LICs or LMICs. Additionally, our study excluded 22 NHPSPs written in languages other than English, Spanish, and French. Of the 22 studies, 91% were from HICs or UMICs. We also used limited search terms to assess the inclusion of children's surgery in the NHPSP reviews, potentially underestimating the number of plans with surgical care embedded. Although this occurrence may be small as we searched for the major terms of surg\* and ped\*, there is a possibility of missing key terms. Deeper analyses of NHPSPs through additional search terms and other qualitative approaches may provide a more robust and thorough search through the plans. Finally, NHPSPs represent only one part of UHC schemes. Further study on the national budget and health policy literature and documents is important in defining the penetration of UHC schemes on surgical care provision for children at national health system levels.

## Conclusion

Our results suggest that pediatric surgical care has a very low impact on the majority of national health plans. NHPSPs are developed to guide national health priorities. Therefore, we have a golden opportunity to incorporate children's surgical care as part of these health plans and, in this way, contribute to the scale-up of surgical care systems for children at a national and global scale. From our findings, we propose the following key policy recommendations for the Member States:

1. Countries should use the Global Initiative for Children's Surgery's Optimal Resources for Children's Surgery (OReCS) guidelines to assess the current state of surgical care for children across multiple health system perspectives and facilitate collaboration with a broad range of health policy and children's surgery stakeholders.
2. Individual countries should define an essential package of children's surgical care across all specialties based on country-level surgical needs for children using language consistent across the Member States.
3. The inclusion of children's surgical needs in WHO NHPSPs and NSOAPs should be prioritized in order to address country-level surgical needs for children.

**Author contributorship:**

Conceptualization: ERS, HR, KL, CCC, YL, JR, NT, RG; Methodology: ERS, HR, KL, CCC, YL, JR, NT, RG; Data collection: CCC, YL, JR, NT, RG; Formal analysis and investigation: CCC; Writing - original draft preparation: ERS, KL, CCC, YL; Writing - review and editing: ERS, KL, CCC, PT, EAA, SWB, LS, JM, HR; Supervision: ERS.

**Competing Interests:** None declared.

**Funding:** None.

**Data sharing statement:** All data for this study are available in a public, open access repository.

**Acknowledgements:** We want to thank the Global Initiative for Children's Surgery (GICS) and the Center for Spatial Research at Baylor University for their support of this work. GICS ([www.globalchildrensurgery.org](http://www.globalchildrensurgery.org)) is a network of children's surgical and anesthesia providers from low-, middle-, and high-income countries collaborating for the purpose of improving the quality of surgical care for children globally. We also thank Dr. Luc Malemo Kalisya for his valuable contribution with the validation of the search terms and their variations in French.

## REFERENCES

1. Mullapudi B, Grabski D, Ameh E, et al. Estimates of number of children and adolescents without access to surgical care. *Bulletin of the World Health Organization* 2019;97(4):254-58. doi: 10.2471/BLT.18.216028
2. Meara JGD, Leather AJMMS, Hagander LP, et al. Global Surgery 2030: evidence and solutions for achieving health, welfare, and economic development. *The Lancet* 2015;386(9993):569-624. doi: 10.1016/S0140-6736(15)60160-X
3. Botman M, Meester R, Voorhoeve R, et al. The Amsterdam Declaration on Essential Surgical Care. *World Journal of Surgery* 2015;39(6):1335-40. doi: 10.1007/s00268-015-3057-x
4. Price R, Makasa E, Hollands M. World Health Assembly Resolution WHA68.15: "Strengthening Emergency and Essential Surgical Care and Anesthesia as a Component of Universal Health Coverage"—Addressing the Public Health Gaps Arising from Lack of Safe, Affordable and Accessible Surgical and Anesthetic Services. *World Journal of Surgery* 2015;39(9):2115-25. doi: 10.1007/s00268-015-3153-y
5. Smith ER, Vissoci JRN, Rocha TAH, et al. Geospatial analysis of unmet pediatric surgical need in Uganda. *Journal of Pediatric Surgery* 2017;52(10):1691-98. doi: 10.1016/j.jpedsurg.2017.03.045
6. Concepcion T, Mohamed M, Dahir S, et al. Prevalence of Pediatric Surgical Conditions Across Somaliland. *JAMA Network Open* 2019;2(1):e186857. doi: 10.1001/jamanetworkopen.2018.6857
7. Butler EK, Tran TM, Nagarajan N, et al. Epidemiology of pediatric surgical needs in low-income countries. *PloS one* 2017;12(3):e0170968. doi: 10.1371/journal.pone.0170968
8. Butler E, Tran T, Fuller A, et al. Quantifying the pediatric surgical need in Uganda: results of a nationwide cross-sectional, household survey. *Pediatric Surgery International* 2016;32(11):1075-85. doi: 10.1007/s00383-016-3957-3
9. Bearden A, Fuller AT, Butler EK, et al. Rural and urban differences in treatment status among children with surgical conditions in Uganda. *PloS one* 2018;13(11):e0205132. doi: 10.1371/journal.pone.0205132 [published Online First: 2018/11/02]
10. Abdul-Mumin A, Anyomih TTK, Owusu SA, et al. Burden of Neonatal Surgical Conditions in Northern Ghana. *World Journal of Surgery* 2019 doi: 10.1007/s00268-019-05210-9
11. Abdelgadir J, Smith ER, Punchak M, et al. Epidemiology and Characteristics of Neurosurgical Conditions at Mbarara Regional Referral Hospital. *World Neurosurgery* 2017;102:526-32. doi: 10.1016/j.wneu.2017.03.019
12. Bickler SW, Rode H. Surgical services for children in developing countries. *Bulletin of the World Health Organization* 2002;80(10):829.
13. Nagarajan N, Gupta S, Shrestha S, et al. Unmet surgical needs in children: a household survey in Nepal. *Pediatric Surgery International* 2015;31(4):389-95. doi: 10.1007/s00383-015-3684-1
14. Yousef Y, Lee A, Ayele F, et al. Delayed access to care and unmet burden of pediatric surgical disease in resource-constrained African countries. *Journal of Pediatric Surgery* 2018;54(4):845-53. doi: 10.1016/j.jpedsurg.2018.06.018
15. Bickler SW, Kyambi J, Rode H. Pediatric surgery in sub-Saharan Africa. *Pediatric Surgery International* 2001;17(5-6):442-47. doi: 10.1007/s003830000516
16. Okoye M, Ameh E, Kushner A, et al. A Pilot Survey of Pediatric Surgical Capacity in West Africa. *World Journal of Surgery* 2015;39(3):669-76. doi: 10.1007/s00268-014-2868-5
17. Kushner A, Groen R, Kamara T, et al. Assessment of Pediatric Surgery Capacity at Government Hospitals in Sierra Leone. *World Journal of Surgery* 2012;36(11):2554-58. doi: 10.1007/s00268-012-1737-3
18. Lalchandani P, Dunn JCY. Global comparison of pediatric surgery workforce and training. *Journal of Pediatric Surgery* 2015;50(7):1180-83. doi: 10.1016/j.jpedsurg.2014.11.032
19. Smith ER, Concepcion TL, Mohamed M, et al. The contribution of pediatric surgery to poverty trajectories in Somaliland. *PloS one* 2019;14(7):e0219974. doi: 10.1371/journal.pone.0219974

20. Smith ER, van de Water BJ, Martin A, et al. Availability of post-hospital services supporting community reintegration for children with identified surgical need in Uganda. *BMC health services research* 2018;18(1) doi: 10.1186/s12913-018-3510-2
21. Saxton AT, Poenaru D, Ozgediz D, et al. Economic Analysis of Children's Surgical Care in Low- and Middle-Income Countries: A Systematic Review and Analysis. *PloS one* 2016;11(10):e0165480. doi: 10.1371/journal.pone.0165480 [published Online First: 2016/10/30]
22. Fuller AT, Haglund MM, Lim S, et al. Pediatric Neurosurgical Outcomes Following a Neurosurgery Health System Intervention at Mulago National Referral Hospital in Uganda. *World Neurosurgery* 2016;95:309-14. doi: 10.1016/j.wneu.2016.07.090
23. Concepcion TL, Smith ER, Mohamed M, et al. Provision of Surgical Care for Children Across Somaliland: Challenges and Policy Guidance. *World Journal of Surgery* 2019;43(11):2934. doi: 10.1007/s00268-019-05079-8
24. Concepcion TL, Dahir S, Mohamed M, et al. Barriers to Surgical Care Among Children in Somaliland: An Application of the Three Delays Framework. *World Journal of Surgery* 2020;44(6):1712-18. doi: 10.1007/s00268-020-05414-4 [published Online First: 2020/02/08]
25. Smith ER, Concepcion TL, Shrimel M, et al. Waiting Too Long: The Contribution of Delayed Surgical Access to Pediatric Disease Burden in Somaliland. *World Journal of Surgery* 2020;44(3):656-64. doi: 10.1007/s00268-019-05239-w [published Online First: 2019/10/28]
26. Smith ER, Concepcion TL, Niemeier KJ, et al. Is Global Pediatric Surgery a Good Investment? *World Journal of Surgery* 2019;43(6):1450-55. doi: 10.1007/s00268-018-4867-4
27. World Health Organization. Supporting national health policies, strategies, plans 2020 [Available from: <https://www.who.int/activities/supporting-national-health-policies-strategies-plans> accessed February 14 2020.
28. United Nations. Sustainable Development Goals 2019 [Available from: <https://sustainabledevelopment.un.org/sdg3> accessed October 14, 2019.
29. World Health Organization. Strategizing national health in the 21st century: a handbook. In: Schmetts G, Kadandale S, Porignon D, et al., eds., 2016.
30. World Health Organization. A framework for national health policies, strategies and plans, 2010.
31. Citron I, Jumbam D, Dahm J, et al. Towards equitable surgical systems: development and outcomes of a national surgical, obstetric and anaesthesia plan in Tanzania. *BMJ Global Health* 2019;4(2) doi: 10.1136/bmjgh-2018-001282
32. Paul T, Haitham S, Ché LR, et al. Globalization of national surgical, obstetric and anesthesia plans: the critical link between health policy and action in global surgery. *Global Health* 2020;16(1):1-8. doi: 10.1186/s12992-019-0531-5
33. Peters A, Roa L, Rwamasirabo E, et al. National Surgical, Obstetric, and Anesthesia Plans Supporting the Vision of Universal Health Coverage. *Global Health: Science and Practice* 2020;8:1.3-9. doi: 10.9745/GHSP-D-19-00314
34. World Health Organization. Multilingualism and WHO 2020 [Available from: <https://www.who.int/about/who-we-are/multilingualism> accessed August 27, 2020.
35. World Health Organization. Country Planning Cycle Database 2019 [Available from: <http://www.nationalplanningcycles.org/planning-cycle/afg> accessed August 27, 2019.
36. Citron I, Chokotho L, Lavy C. Prioritisation of Surgery in the National Health Strategic Plans of Africa: A Systematic Review. *World journal of surgery* 2015;40(4):779-83. doi: 10.1007/s00268-015-3333-9
37. World Bank. New World Bank GDP and poverty estimates for Somaliland 2014 [Available from: <https://www.worldbank.org/en/news/press-release/2014/01/29/new-world-bank-gdp-and-poverty-estimates-for-somaliland> accessed July 16, 2019.
38. Debas HT, Donkor P, Gawande A, et al. Disease Control Priorities, Third Edition : Volume 1. Essential Surgery: Washington, DC: World Bank 2015.

- 1  
2  
3 39. Population Reference Bureau. 2018 World Population Data Sheet With Focus on Changing Age  
4 Structures 2020 [Available from: [https://www.prb.org/2018-world-population-data-sheet-with-](https://www.prb.org/2018-world-population-data-sheet-with-focus-on-changing-age-structures/)  
5 [focus-on-changing-age-structures/](https://www.prb.org/2018-world-population-data-sheet-with-focus-on-changing-age-structures/) accessed February 14 2020.
- 6 40. Smith E, Concepcion T, Lim S, et al. Disability Weights for Pediatric Surgical Procedures: A  
7 Systematic Review and Analysis. *World Journal of Surgery* 2018;42(9):3021-34. doi:  
8 10.1007/s00268-018-4537-6
- 9 41. Guest GD, Scott DF, Xavier JP, et al. Surgical capacity building in Timor-Leste: a review of the first  
10 15 years of the Royal Australasian College of Surgeons-led Australian Aid programme. *ANZ*  
11 *journal of surgery* 2017;87(6):436-40. doi: 10.1111/ans.13768 [published Online First:  
12 2016/09/21]
- 13 42. Guest GD, McLeod E, Perry WRG, et al. Collecting data for global surgical indicators: a collaborative  
14 approach in the Pacific Region. *BMJ Global Health* 2017;2(4):e000376-e76. doi: 10.1136/bmjgh-  
15 2017-000376
- 16 43. Global Initiative for Children's Surgery. Optimal Resources for Children's Surgical Care: Executive  
17 Summary. *World Journal of Surgery* 2019;43(4):978-80. doi: 10.1007/s00268-018-04888-7
- 18 44. Global Initiative for Children's Surgery. Global Initiative for Children's Surgery: A Model of Global  
19 Collaboration to Advance the Surgical Care of Children. *World Journal of Surgery*  
20 2019;43(6):1416-25. doi: 10.1007/s00268-018-04887-8 [published Online First: 2019/01/10]
- 21 45. Boerma T, Eozenou P, Evans D, et al. Monitoring Progress towards Universal Health Coverage at  
22 Country and Global Levels. *PLoS medicine* 2014;11(9):e1001731. doi:  
23 10.1371/journal.pmed.1001731  
24  
25  
26  
27

## 28 **FIGURE LEGEND**

29  
30 **Figure 1.** Flowchart of data search process.

31  
32  
33 **Figure 2.** Percentage of countries from each WHO's region that mention the search terms in their  
34 NHPSPs at least once . Weighted percent was used to facilitate comparison across regions.

35  
36  
37  
38 **Figure 3.** Percentage of countries from each World Bank Income level that mention the search terms in  
39 their NHPSPs at least once. Weighted percent was used to facilitate comparison across income levels.

40  
41  
42  
43 **Figure 4.** Example of Nigeria: Inclusion of children's surgical care within national health plans.  
44  
45  
46  
47  
48  
49  
50  
51  
52  
53  
54  
55  
56  
57  
58  
59  
60

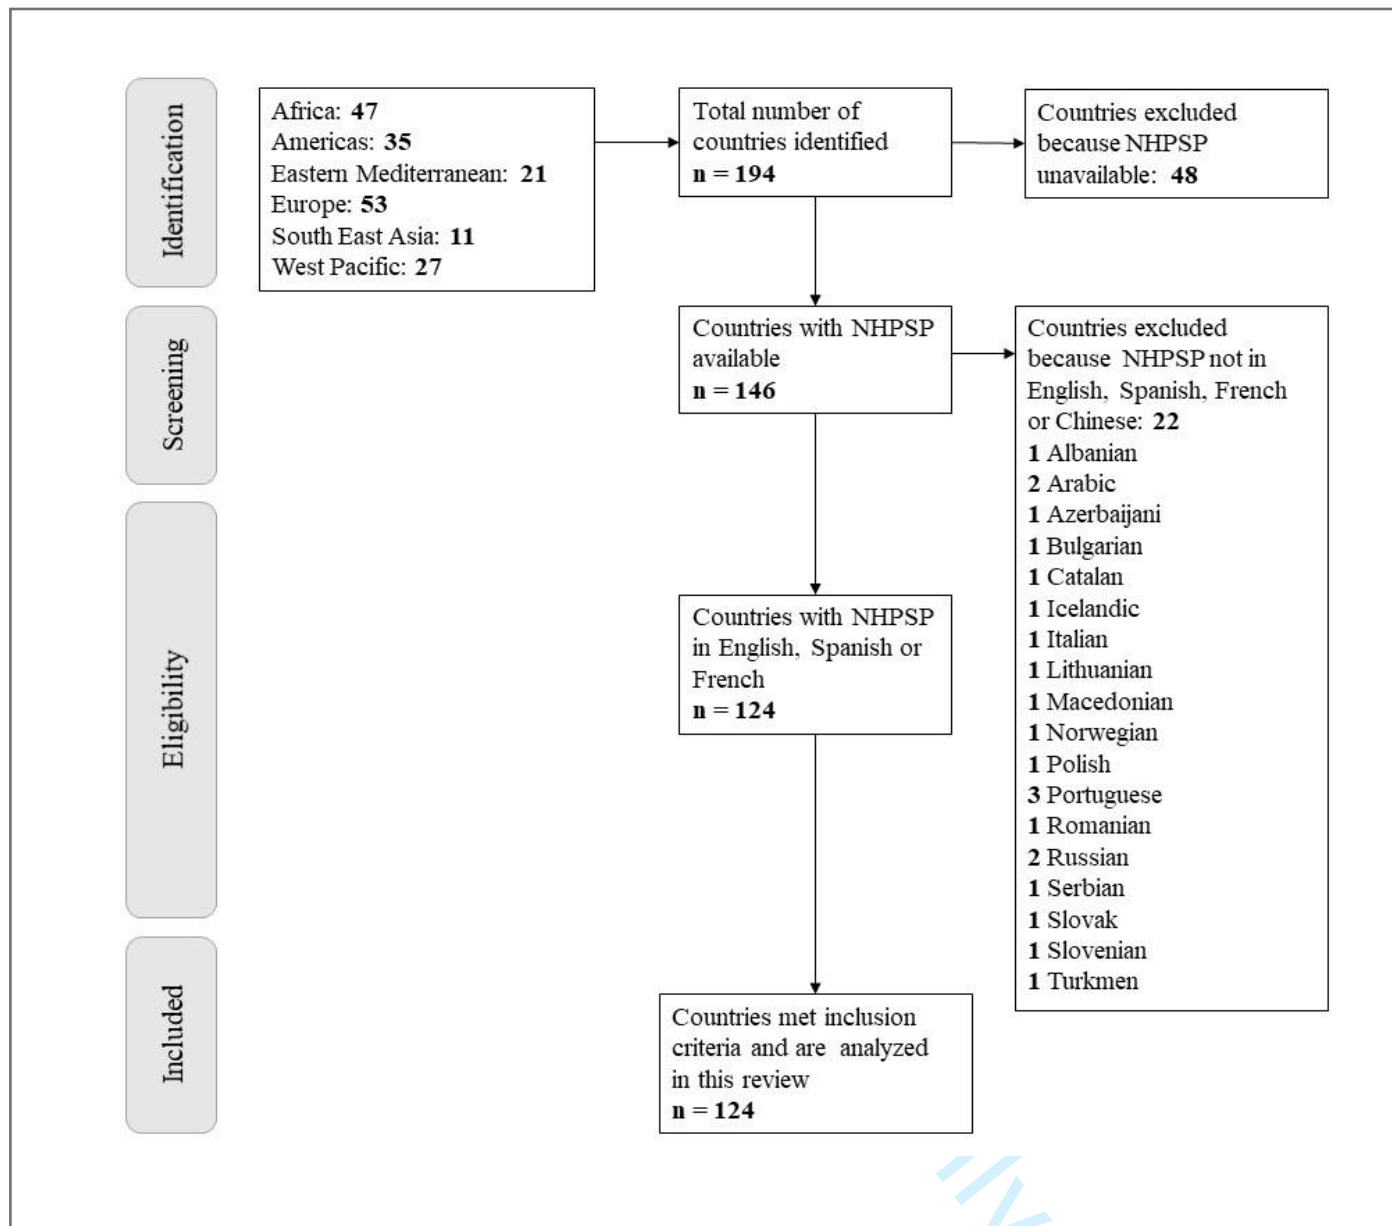

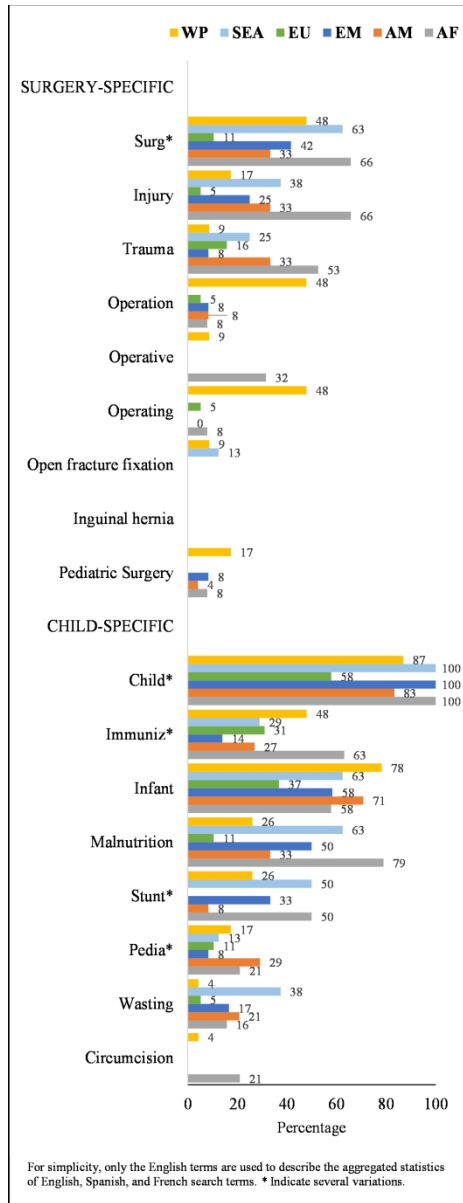

Figure 2. Percentage of countries from each WHO's region that mention the search terms in their NHPSPs at least once. Weighted percent was used to facilitate comparison across regions.

104x267mm (300 x 300 DPI)

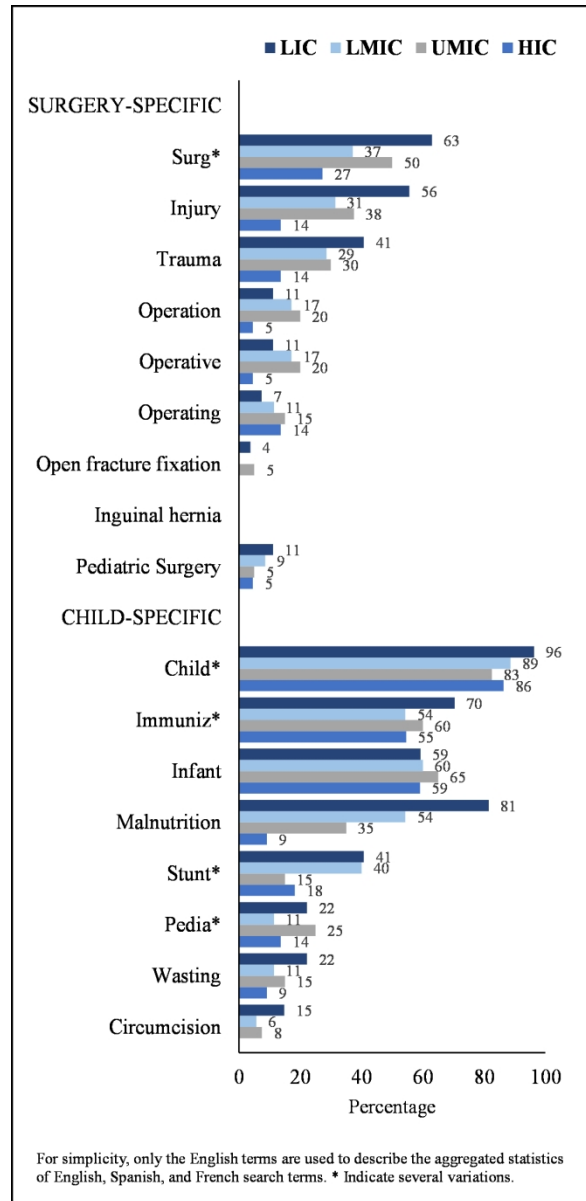

Figure 3. Percentage of countries from each World Bank Income level that mention the search terms in their NHPSPs at least once. Weighted percent was used to facilitate comparison across income levels.

103x211mm (300 x 300 DPI)



Recommendations include:

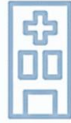

### INFRASTRUCTURE

Creation of one federal children's hospital.

Availability of a package of essential children's surgery at all healthcare levels, including the provision of specialized equipment and supplies.

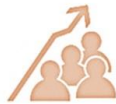

### WORKFORCE

Provision of specialized human resources for children's surgery.

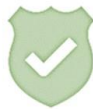

### SERVICE DELIVERY

Integrate and create efficient referral system for children's surgery.

Increase capacity of tertiary levels of care for advanced surgical care for children.

Availability of critical care and pre-hospital services.

Review only

**Supplemental material 1:** Complete list of search terms and associated variations found in NHPSs, stratified by language English, French, and Spanish.

| ENGLISH                                                                  |                                                         | FRENCH                                                                                                                                      |                                                                                                                  | SPANISH                                                                    |                                                                                  |
|--------------------------------------------------------------------------|---------------------------------------------------------|---------------------------------------------------------------------------------------------------------------------------------------------|------------------------------------------------------------------------------------------------------------------|----------------------------------------------------------------------------|----------------------------------------------------------------------------------|
| Search Terms                                                             | Variations found                                        | Search Terms                                                                                                                                | Variations found                                                                                                 | Search Terms                                                               | Variations found                                                                 |
| <b>Surgery-specific</b>                                                  |                                                         |                                                                                                                                             |                                                                                                                  |                                                                            |                                                                                  |
| surg*                                                                    | surgery, surgeries, surgical, neurosurgery, and surgeon | chirurgi*                                                                                                                                   | chirurgie, chirurgien, chirurgicale, chirurgicaux, chirurgiens, neurochirurgien, médicochirurgicaux, chirurgical | cirug* / ciruj* / quirurgic*                                               | cirugía, cirujano, cirujanos, quirúrgico                                         |
| injury<br>trauma                                                         |                                                         | blesure*<br>traumat*                                                                                                                        | blesure, blessures<br>traumatismes, traumatique, traumatology                                                    | lesion*<br>trauma*                                                         | lesión, lesiones<br>trauma, traumatismo                                          |
| operation<br>operative<br>operating<br>open fracture fixation / fracture |                                                         | operation / intervention<br>opérateur<br>opérateur / opérant<br>fixation de fracture ouverte / ostéosynthèse de fracture ouverte / fracture |                                                                                                                  | operacion*<br>operativo*<br>N/A<br>fijación de fractura abierta / fractura | operación, operaciones<br>operativo, operativos                                  |
| inguinal hernia / hernia<br>pediatric surgery                            |                                                         | hernie inguinale / hernie<br><br>chirurgie pédiatrique                                                                                      |                                                                                                                  | hernia inguinal / hernia<br><br>cirugía pediátrica                         |                                                                                  |
| <b>Children-specific</b>                                                 |                                                         |                                                                                                                                             |                                                                                                                  |                                                                            |                                                                                  |
| child*                                                                   | child, children, childbearing, childbirth, childhood    | enfant* / naissance                                                                                                                         | enfant, enfants, enfance,                                                                                        | niñ*                                                                       | niño, niños, niña, niñas, niñez                                                  |
| immuniz*                                                                 | immunization, immunized                                 | immunis* / vaccin*                                                                                                                          | Immunisation, vacciné                                                                                            | vacuna* inmuniz*                                                           | vacuna, vacunación, vacunaciones, inmunización, inmunizaciones                   |
| infant<br>malnutrition<br>stunt*<br>pedia*                               | stunting<br>pediatric, pediatrics                       | bébé / infant*<br>malnutrition<br>retard de croissance<br>pédiatr*                                                                          | infantile<br><br>pédiatrique, pédiatriques, pédiatres, pédiatrie,                                                | infant*<br>desnutrición<br>retraso en el crecimiento<br>pedia*             | infante, infantes, infantil<br><br>pediátrico, pediatria, pediátrica, pediatras, |
| wasting<br>circumcision                                                  |                                                         | dépérissement<br>circoncision / posthectomy                                                                                                 |                                                                                                                  | anemia<br>circuncisión                                                     |                                                                                  |

**Supplemental material 2:** Country health plans stratified by WHO's region and World Bank's income classification level.

|                                               | <b>Total</b> | <b>Excluded because NHPSP unavailable</b> | <b>Excluded because not in English, Spanish, or French</b> | <b>Total available for search</b> |
|-----------------------------------------------|--------------|-------------------------------------------|------------------------------------------------------------|-----------------------------------|
|                                               | n (%)        | n (%)                                     | n (%)                                                      | n (%)                             |
|                                               | 194 (100.0)  | 48 (100.0)                                | 22 (100.0)                                                 | 124 (100.0)                       |
| <b>WHO region</b>                             |              |                                           |                                                            |                                   |
| Africa                                        | 47 (24.2)    | 7 (14.6)                                  | 2 (9.1)                                                    | 38 (30.6)                         |
| Americas                                      | 35 (18.0)    | 10 (20.8)                                 | 1 (4.5)                                                    | 24 (19.4)                         |
| Eastern Mediterranean                         | 21 (10.8)    | 7 (15.6)                                  | 2 (9.1)                                                    | 12 (9.7)                          |
| Europe                                        | 53 (27.3)    | 17 (35.4)                                 | 17 (77.3)                                                  | 19 (15.3)                         |
| South East Asia                               | 11 (5.7)     | 3 (6.3)                                   | 0 (0.0)                                                    | 8 (6.5)                           |
| West Pacific                                  | 27 (13.9)    | 4 (8.3)                                   | 0 (0.0)                                                    | 23 (18.5)                         |
| <b>World Bank Income Classification Level</b> |              |                                           |                                                            |                                   |
| HIC                                           | 56 (28.9)    | 25 (52.1)                                 | 9 (40.9)                                                   | 22 (17.7)                         |
| UMIC                                          | 61 (31.4)    | 10 (20.8)                                 | 11 (50.0)                                                  | 40 (32.2)                         |
| LMIC                                          | 44 (22.7)    | 7 (14.6)                                  | 2 (9.1)                                                    | 35 (28.5)                         |
| LIC                                           | 33 (17.0)    | 6 (12.5)                                  | 0 (0.0)                                                    | 27 (21.8)                         |

HIC=High Income Countries, UMIC=Upper-Middle-Income Countries, LMIC=Lower-Middle-Income Countries, LIC=Low Income Countries.

**Supplemental material 3:** Search Terms in English, French, and Spanish with number of citations stratified by WHO regions and World Bank income classification level.

|                          | WHO Region   |             |             |             |              |             | World Bank Income Classification Level |               |               |              | TOTAL        |
|--------------------------|--------------|-------------|-------------|-------------|--------------|-------------|----------------------------------------|---------------|---------------|--------------|--------------|
|                          | AF<br>n (%)  | AM<br>n (%) | EM<br>n (%) | EU<br>n (%) | SEA<br>n (%) | WP<br>n (%) | HIC<br>n (%)                           | UMIC<br>n (%) | LMIC<br>n (%) | LIC<br>n (%) | n (%)        |
|                          | 2330 (100.0) | 325 (100.0) | 175 (100.0) | 224 (100.0) | 209 (100.0)  | 520 (100.0) | 286 (100.0)                            | 838 (100.0)   | 1065 (100.0)  | 1594 (100.0) | 3783 (100.0) |
| <b>Surgery-specific</b>  |              |             |             |             |              |             |                                        |               |               |              |              |
| Surg*                    | 169 (7.3)    | 17 (5.2)    | 21 (12.0)   | 4 (1.8)     | 23 (11.0)    | 35 (6.7)    | 11 (3.8)                               | 80 (9.5)      | 58 (5.4)      | 120 (7.5)    | 269 (7.1)    |
| Injury                   | 123 (5.3)    | 11 (3.4)    | 3 (1.7)     | 1 (0.4)     | 10 (4.8)     | 7 (1.3)     | 20 (7.0)                               | 23 (2.7)      | 48 (4.5)      | 64 (4.0)     | 155 (4.1)    |
| Trauma                   | 73 (3.1)     | 15 (4.6)    | 1 (0.6)     | 3 (1.3)     | 6 (2.9)      | 4 (0.8)     | 5 (1.7)                                | 27 (3.2)      | 40 (3.8)      | 30 (1.9)     | 102 (2.7)    |
| Operation                | 7 (0.3)      | 4 (1.2)     | 1 (0.6)     | 1 (0.4)     | 0 (0.0)      | 62 (11.9)   | 1 (0.3)                                | 39 (4.7)      | 32 (3.0)      | 3 (0.2)      | 75 (2.0)     |
| Operative                | 26 (1.1)     | 0 (0.0)     | 0 (0.0)     | 0 (0.0)     | 0 (0.0)      | 6 (1.2)     | 4 (1.4)                                | 6 (0.7)       | 13 (1.2)      | 9 (0.6)      | 32 (0.8)     |
| Operating                | 7 (0.3)      | 0 (0.0)     | 0 (0.0)     | 1 (0.4)     | 0 (0.0)      | 20 (3.8)    | 5 (1.7)                                | 12 (1.4)      | 5 (0.5)       | 6 (0.4)      | 28 (0.7)     |
| Open Frac. Fix.          | 0 (0.0)      | 0 (0.0)     | 0 (0.0)     | 0 (0.0)     | 1 (0.5)      | 2 (0.4)     | 0 (0.0)                                | 2 (0.2)       | 0 (0.0)       | 1 (0.1)      | 3 (0.1)      |
| Inguinal Hernia          | 0 (0.0)      | 0 (0.0)     | 0 (0.0)     | 0 (0.0)     | 0 (0.0)      | 0 (0.0)     | 0 (0.0)                                | 0 (0.0)       | 0 (0.0)       | 0 (0.0)      | 0 (0.0)      |
| 'Pediatric Surgery'      | 3 (0.1)      | 1 (0.3)     | 0 (0.0)     | 1 (0.4)     | 0 (0.0)      | 4 (0.8)     | 1 (0.3)                                | 2 (0.2)       | 3 (0.3)       | 3 (0.2)      | 9 (0.2)      |
| <b>Children-specific</b> |              |             |             |             |              |             |                                        |               |               |              |              |
| Child*                   | 1396 (59.9)  | 170 (52.3)  | 88 (50.3)   | 143 (63.8)  | 101 (48.3)   | 244 (46.9)  | 145 (50.7)                             | 426 (50.8)    | 620 (58.2)    | 951 (59.7)   | 2142 (56.6)  |
| Immuniz*                 | 131 (5.6)    | 27 (8.3)    | 14 (8.0)    | 31 (13.8)   | 29 (13.9)    | 48 (9.2)    | 30 (10.5)                              | 57 (6.8)      | 88 (8.3)      | 105 (6.6)    | 280 (7.4)    |
| Infant                   | 127 (5.5)    | 36 (11.1)   | 23 (13.1)   | 28 (12.5)   | 20 (9.6)     | 51 (9.8)    | 41 (14.3)                              | 89 (10.6)     | 70 (6.6)      | 85 (5.3)     | 285 (7.5)    |
| Malnutrition             | 173 (7.4)    | 20 (6.2)    | 16 (9.1)    | 8 (3.6)     | 9 (4.3)      | 16 (3.1)    | 7 (2.4)                                | 35 (4.2)      | 49 (4.6)      | 151 (9.5)    | 242 (6.4)    |
| Stunt*                   | 48 (2.1)     | 2 (0.6)     | 4 (2.3)     | 0 (0.0)     | 5 (2.4)      | 8 (1.5)     | 5 (1.7)                                | 6 (0.7)       | 26 (2.4)      | 30 (1.9)     | 67 (1.8)     |
| Pedia*                   | 16 (0.7)     | 11 (3.4)    | 2 (1.1)     | 2 (0.9)     | 2 (1.0)      | 11 (2.1)    | 7 (2.4)                                | 17 (2.0)      | 7 (0.7)       | 13 (0.8)     | 44 (1.2)     |
| Wasting                  | 15 (0.6)     | 11 (3.4)    | 2 (1.1)     | 1 (0.4)     | 3 (1.4)      | 1 (0.2)     | 4 (1.4)                                | 10 (1.2)      | 4 (0.4)       | 15 (0.9)     | 33 (0.9)     |
| Circumcision             | 16 (0.7)     | 0 (0.0)     | 0 (0.0)     | 0 (0.0)     | 0 (0.0)      | 1 (0.2)     | 0(0.0)                                 | 7 (0.8)       | 2 (0.2)       | 8 (0.5)      | 17 (0.4)     |

AF=African region, AM=American region, EM= Eastern Mediterranean region, EU=European region, SEA=South East Asia region, WP=West Pacific region.

HIC=High Income Countries, UMIC=Upper-Middle-Income Countries, LMIC=Lower-Middle-Income Countries, LIC=Low Income Countries.

For simplicity, only the English terms are used to describe the aggregated statistics of English, Spanish, and French search terms.

<sup>a</sup> *surg\** includes surgery, surgeries, surgical, neurosurgery, and surgeon. <sup>b</sup> *child\** includes child, children, childbearing, childbirth, and childhood. <sup>c</sup> *immuniz\** includes immunization, and immunized. <sup>d</sup> *stunt\** includes stunting. <sup>e</sup> *pedia\** includes pediatric and pediatrics.

Supplemental material 4: Percentages of search terms in English, French, and Spanish with number of citations stratified by WHO regions.

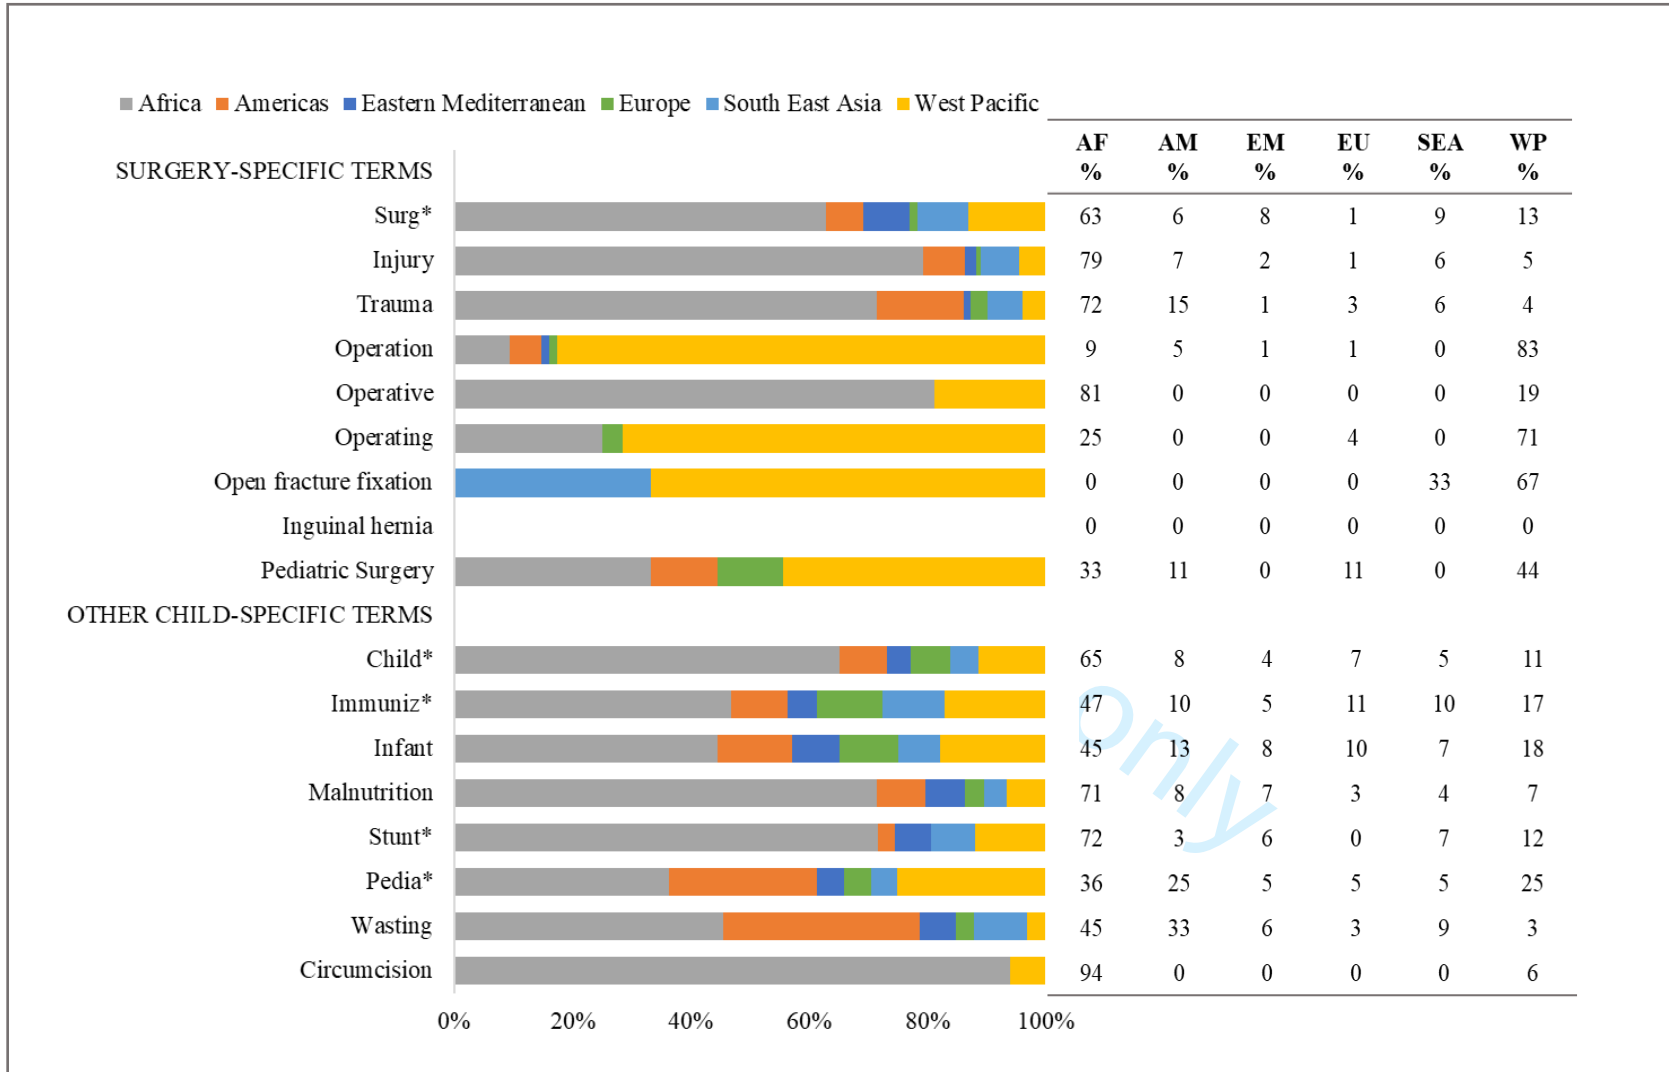

For simplicity, only the English terms are used to describe the aggregated statistics of English, Spanish, and French search terms.  
*surg\** includes surgery, surgeries, surgical, neurosurgery, and surgeon. *child\** includes child, children, childbearing, childbirth, and childhood.  
*immuniz\** includes immunization, and immunized. *stunt\** includes stunting. *pedia\** includes pediatric and pediatrics.

**Supplemental material 5:** Percentages of search terms in English, French, and Spanish with number of citations stratified by World Bank income classification level.

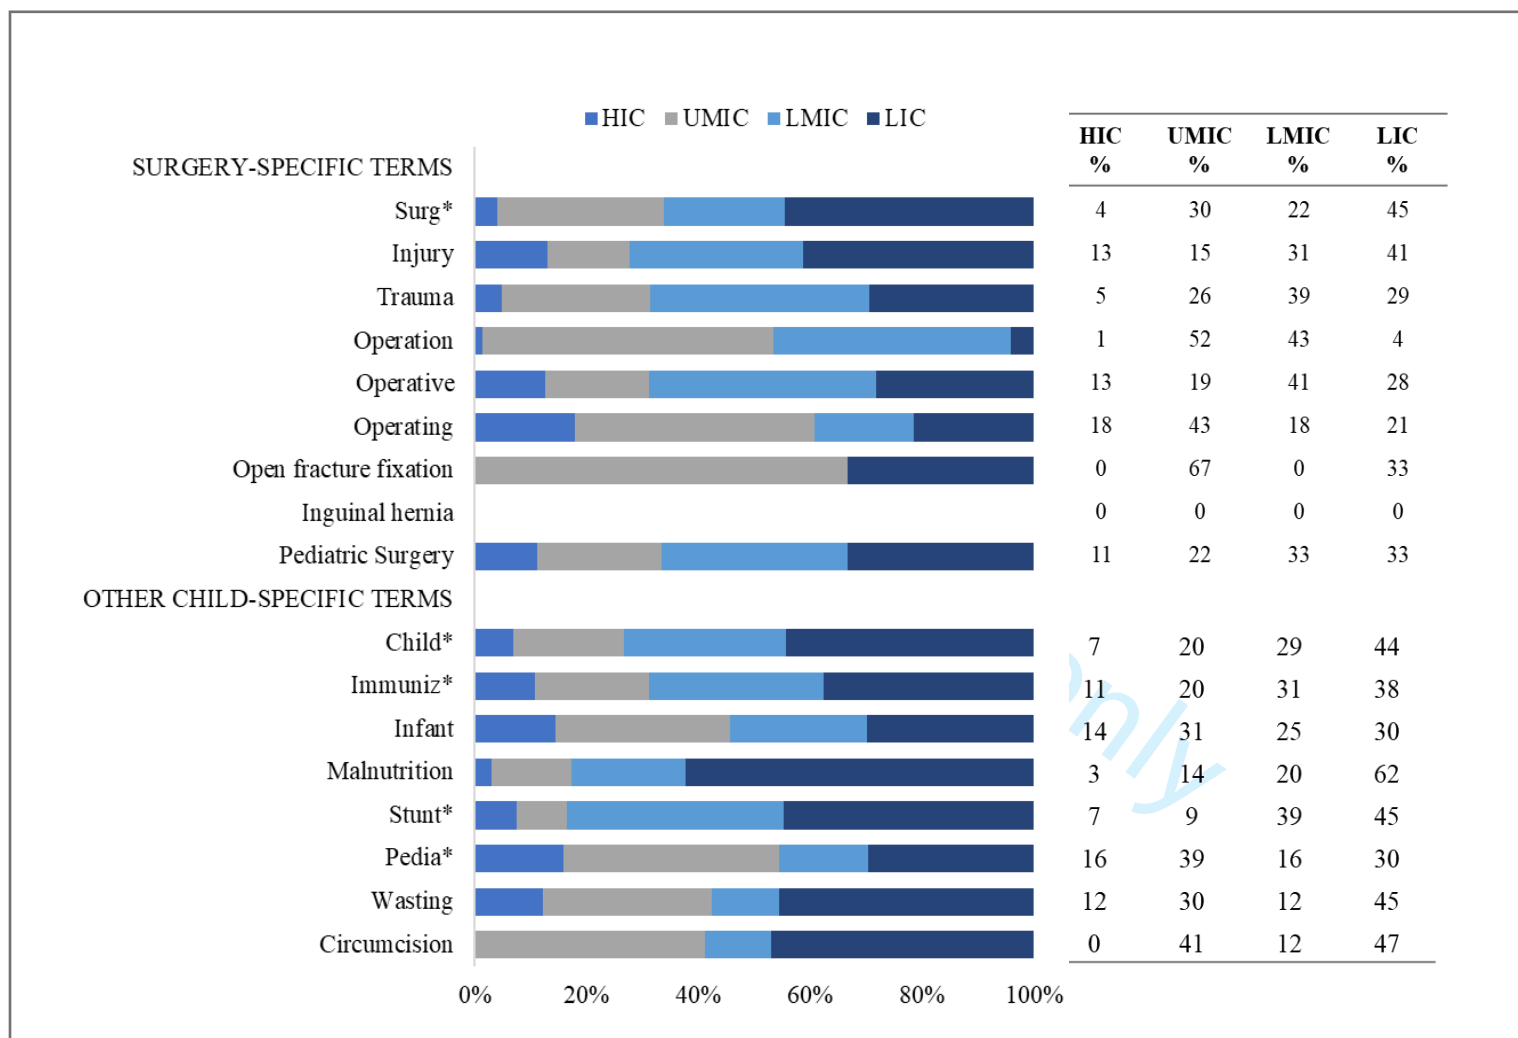

HIC=High Income Countries, UMIC=Upper-Middle-Income Countries, LMIC=Lower-Middle-Income Countries, LIC=Low Income Countries. For simplicity, only the English terms are used to describe the aggregated statistics of English, Spanish, and French search terms. *surg\** includes surgery, surgeries, surgical, neurosurgery, and surgeon. *child\** includes child, children, childbearing, childbirth, and childhood. *immuniz\** includes immunization, and immunized. *stunt\** includes stunting. *pedia\** includes pediatric and pediatrics.
